# Supplementary material for: Comparing Within- and Between-Family Polygenic Score Prediction
Source: PubMed Central journal article supplement (PMC6698881; doi:10.1016/j.ajhg.2019.06.006), 2019-07-11
Supplement: mmc1.pdf [file mmc1.pdf]

**The American Journal of Human Genetics, Volume 105**

**Supplemental Data**

**Comparing Within- and Between-Family**

**Polygenic Score Prediction**

**Saskia Selzam, Stuart J. Ritchie, Jean-Baptiste Pingault, Chandra A. Reynolds, Paul F. O'Reilly, and Robert Plomin**

### ***Supplementary Figures***

**Figure S1. Within-twin pair Pearson's correlation coefficients.**

**Figure S2. Effect sizes and significance of differences comparing between-family coefficients before and after controlling for family socio-economic status**

**Figure S3. Within- and between-family prediction estimates accounting for separate measures of family socio-economic status**

**Figure S4. Within- and between-family prediction estimates for same-sex twin pairs**

**Figure S5. Within- and between-family prediction estimates for opposite-sex twin pairs**

**Figure S6. Within- and between-family prediction estimates based on twin pairs genotyped on OEE chip**

**Figure S7. Within- and between-family prediction estimates based on twin pairs genotyped on OEE chip and the co-twin genotyped on the Affymetrix chip**

**Figure S8. Within- and between-family coefficients estimated using a SNP-kinship matrix as random effect**

**Figure S9. Within- and between-family prediction estimates using polygenic scores calculated with causal fraction of markers of 0.1**

**Figure S10. Within- and between-family prediction estimates based on polygenic scores with UK Biobank or all UK discovery samples removed**

### ***Supplementary Tables***

**Table S1. Descriptive statistics, age and sex effects for phenotypes**

**Table S2. GWAS used for polygenic score calculation**

**Table S3. Intraclass coefficients for same-sex and opposite-sex twin pairs**

**Table S4. Intraclass coefficients for twin pairs split by genotyping chip**

**Table S5. Intraclass coefficients**

**Table S12. Within- and between-family prediction estimates of family socio-economic status**

**Table S24. Within- and between-family prediction estimates based on polygenic scores with UK Biobank or all UK discovery samples removed**

**Table S25 Phenotypic and polygenic score mean differences by polygenic score difference quantiles**

### ***Supplementary Methods***

**Methods S1. Polygenic score calculation**

### ***References***

# Supplementary Figures

Figure S1. Within-twin pair Pearson's correlation coefficients.

|                   |                         |                         |                         |                         |                         |                         |                         |                        |                        |                         |                         |                         |                         |                      |                      |                    |
|-------------------|-------------------------|-------------------------|-------------------------|-------------------------|-------------------------|-------------------------|-------------------------|------------------------|------------------------|-------------------------|-------------------------|-------------------------|-------------------------|----------------------|----------------------|--------------------|
| SCZ symptoms 1    | 0.02<br>[-0.04, 0.07]   | 0.07<br>[0.01, 0.12]    | -0.11<br>[-0.16, -0.06] | 0.00<br>[-0.05, 0.06]   | -0.08<br>[-0.13, -0.03] | 0.04<br>[-0.01, 0.09]   | 0.01<br>[-0.04, 0.06]   | 0.03<br>[-0.02, 0.08]  | -0.04<br>[-0.1, 0.02]  | 0.10<br>[0.04, 0.15]    | -0.14<br>[-0.2, -0.09]  | -0.06<br>[-0.12, 0.01]  | -0.12<br>[-0.18, -0.07] | 0.02<br>[-0.07, 0.1] | 0.20<br>[0.15, 0.26] | 0.25<br>[0.2, 0.3] |
| ADHD symptoms 1   | -0.03<br>[-0.07, 0.01]  | 0.06<br>[0.02, 0.1]     | -0.10<br>[-0.14, -0.06] | -0.06<br>[-0.1, -0.02]  | -0.05<br>[-0.08, -0.01] | 0.03<br>[-0.01, 0.07]   | 0.07<br>[0.03, 0.11]    | 0.00<br>[-0.04, 0.04]  | -0.05<br>[-0.1, 0]     | 0.05<br>[0, 0.11]       | -0.13<br>[-0.18, -0.08] | -0.11<br>[-0.16, -0.06] | -0.13<br>[-0.17, -0.09] | 0.03<br>[-0.04, 0.1] | 0.30<br>[0.26, 0.34] | ***                |
| Neuroticism 1     | 0.00<br>[-0.07, 0.06]   | -0.02<br>[-0.09, 0.04]  | 0.00<br>[-0.07, 0.06]   | 0.00<br>[-0.07, 0.06]   | 0.05<br>[-0.01, 0.12]   | 0.05<br>[-0.02, 0.11]   | -0.04<br>[-0.1, 0.03]   | -0.02<br>[-0.09, 0.05] | -0.03<br>[-0.11, 0.05] | 0.01<br>[-0.07, 0.1]    | -0.09<br>[-0.16, -0.01] | 0.05<br>[-0.03, 0.13]   | 0.04<br>[-0.03, 0.11]   | 0.10<br>[0.03, 0.17] | *                    |                    |
| GCSE 1            | 0.02<br>[-0.02, 0.06]   | -0.09<br>[-0.13, -0.05] | 0.12<br>[0.08, 0.15]    | 0.19<br>[0.15, 0.23]    | 0.25<br>[0.22, 0.29]    | -0.04<br>[-0.08, 0]     | -0.11<br>[-0.14, -0.07] | 0.03<br>[-0.01, 0.07]  | 0.05<br>[0, 0.1]       | -0.13<br>[-0.18, -0.08] | 0.07<br>[0.02, 0.12]    | 0.33<br>[0.29, 0.38]    | 0.58<br>[0.55, 0.61]    |                      | ***                  | ***                |
| IQ 1              | 0.02<br>[-0.03, 0.06]   | -0.02<br>[-0.07, 0.03]  | 0.06<br>[0.01, 0.11]    | 0.16<br>[0.11, 0.21]    | 0.14<br>[0.09, 0.18]    | -0.03<br>[-0.07, 0.02]  | -0.06<br>[-0.11, -0.02] | -0.04<br>[-0.09, 0.01] | -0.03<br>[-0.08, 0.03] | -0.08<br>[-0.14, -0.02] | 0.01<br>[-0.05, 0.07]   | 0.43<br>[0.39, 0.47]    | ***                     |                      | ***                  |                    |
| SRH 1             | 0.05<br>[0, 0.1]        | -0.06<br>[-0.11, -0.02] | 0.10<br>[0.05, 0.14]    | -0.03<br>[-0.07, 0.02]  | 0.02<br>[-0.03, 0.07]   | -0.01<br>[-0.06, 0.03]  | -0.03<br>[-0.07, 0.02]  | -0.03<br>[-0.07, 0.02] | 0.02<br>[-0.03, 0.07]  | -0.04<br>[-0.09, 0.01]  | 0.14<br>[0.09, 0.19]    |                         |                         | *                    |                      | ***                |
| BMI 1             | -0.01<br>[-0.05, 0.04]  | 0.21<br>[0.16, 0.25]    | -0.07<br>[-0.12, -0.02] | 0.00<br>[-0.05, 0.04]   | -0.08<br>[-0.13, -0.04] | -0.07<br>[-0.12, -0.02] | 0.06<br>[0.01, 0.1]     | -0.05<br>[-0.1, 0]     | 0.01<br>[-0.04, 0.06]  | 0.32<br>[0.27, 0.36]    | *                       | *                       | ***                     |                      | ***                  | **                 |
| Height 1          | 0.26<br>[0.22, 0.3]     | -0.03<br>[-0.07, 0.02]  | 0.04<br>[0, 0.09]       | 0.02<br>[-0.03, 0.07]   | 0.00<br>[-0.05, 0.04]   | -0.04<br>[-0.08, 0.01]  | -0.01<br>[-0.06, 0.04]  | -0.04<br>[-0.09, 0.01] | 0.44<br>[0.4, 0.48]    |                         |                         |                         | *                       | *                    |                      |                    |
| SCZ GPS 1         | -0.04<br>[-0.07, 0]     | -0.04<br>[-0.08, -0.01] | -0.03<br>[-0.06, 0]     | -0.08<br>[-0.11, -0.05] | 0.02<br>[-0.02, 0.05]   | 0.06<br>[0.03, 0.1]     | 0.03<br>[0, 0.06]       | 0.53<br>[0.5, 0.55]    |                        |                         |                         |                         |                         |                      |                      |                    |
| ADHD GPS 1        | 0.00<br>[-0.04, 0.03]   | 0.10<br>[0.06, 0.13]    | -0.12<br>[-0.15, -0.09] | -0.07<br>[-0.11, -0.04] | -0.13<br>[-0.16, -0.1]  | 0.04<br>[0.01, 0.07]    | 0.51<br>[0.48, 0.53]    |                        |                        |                         | *                       | *                       | ***                     |                      |                      |                    |
| Neuroticism GPS 1 | -0.05<br>[-0.08, -0.01] | 0.01<br>[-0.02, 0.05]   | -0.16<br>[-0.2, -0.13]  | -0.04<br>[-0.07, 0]     | -0.10<br>[-0.13, -0.06] | 0.49<br>[0.46, 0.51]    | **                      | **                     |                        |                         | *                       |                         | *                       | *                    | *                    | *                  |
| EA GPS 1          | 0.09<br>[0.05, 0.12]    | -0.15<br>[-0.18, -0.12] | 0.25<br>[0.21, 0.28]    | 0.26<br>[0.23, 0.29]    | 0.57<br>[0.54, 0.59]    | ***                     | ***                     |                        | *                      | *                       | *                       | ***                     | ***                     |                      | **                   | *                  |
| IQ GPS 1          | 0.05<br>[0.01, 0.08]    | -0.07<br>[-0.1, -0.04]  | 0.15<br>[0.12, 0.18]    | 0.54<br>[0.51, 0.56]    | ***                     | *                       | ***                     | **                     | *                      | *                       |                         | ***                     | ***                     |                      | *                    |                    |
| SRH GPS 1         | 0.06<br>[0.02, 0.09]    | -0.20<br>[-0.24, -0.17] | 0.53<br>[0.51, 0.56]    | ***                     | ***                     | ***                     | ***                     | **                     |                        | *                       |                         | ***                     | ***                     |                      | **                   |                    |
| BMI GPS 1         | -0.05<br>[-0.08, -0.01] | 0.52<br>[0.49, 0.54]    | ***                     |                         | ***                     |                         | ***                     | *                      |                        | ***                     | *                       |                         | ***                     |                      | *                    | *                  |
| Height GPS 1      | 0.52<br>[0.49, 0.54]    | *                       | *                       | *                       | *                       |                         |                         |                        | ***                    | *                       |                         |                         |                         |                      |                      |                    |
|                   | Height GPS 2            | BMI GPS 2               | SRH GPS 2               | IQ GPS 2                | EA GPS 2                | Neuroticism GPS 2       | ADHD GPS 2              | SCZ GPS 2              | Height 2               | BMI 2                   | SRH 2                   | IQ 2                    | GCSE 2                  | Neuroticism 2        | ADHD symptoms 2      | SCZ symptoms 2     |

**Note.** BMI = Body Mass Index; IQ = Intelligence; GCSE = General Certificate of Secondary Education (educational achievement); ADHD = Attention-Deficit/Hyperactivity Disorder; SCZ = Schizophrenia; EA = Educational Attainment; SRH = Self-rated Health; 1 = Twin 1; 2 = Twin 2.

Figure S2. Effect sizes and significance of differences comparing between-family coefficients before and after controlling for family socio-economic status

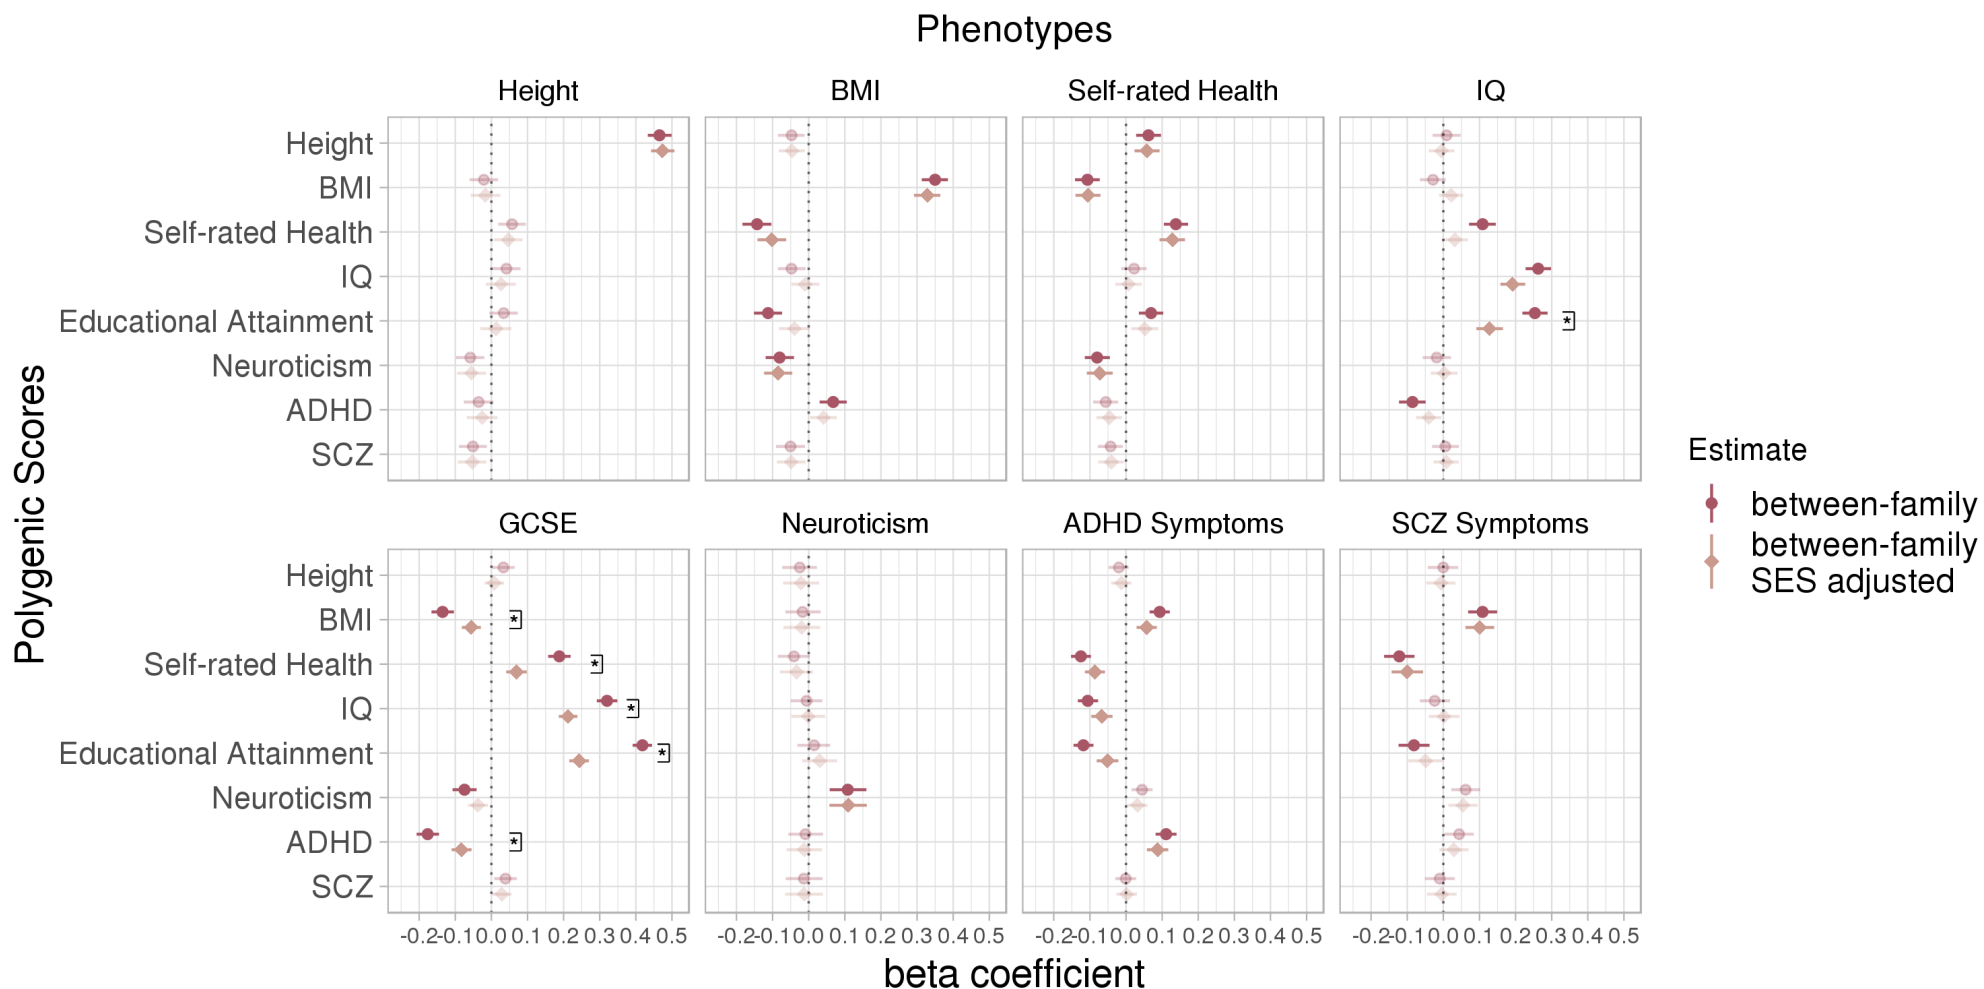

**Note.** Between-family prediction estimates of eight developmental outcomes using eight polygenic scores before and after statistical correction for family socio-economic status. Genome-wide Polygenic Scores are presented on the y-axis, predicting each of the eight phenotypic traits. Error bars are 95% bootstrap percentile intervals based on 10,000 bootstrap samples (random resampling of DZ twin pairs with replacement). Opaque estimates indicate statistical significance at the false discovery rate corrected threshold of  $p < 0.01$ . Brackets indicate a significant difference between the two between-family prediction estimates, and only significant differences are shown where at least one of the estimates is significant at the false discovery rate corrected threshold of  $p < 0.01$ . The dotted line represents a beta coefficient of zero. BMI = Body Mass Index; IQ = Intelligence; GCSE = General Certificate of Secondary Education (educational achievement); ADHD = Attention-Deficit/Hyperactivity Disorder; SCZ = Schizophrenia.

Figure S3. Within- and between-family prediction estimates accounting for separate measures of family socio-economic status

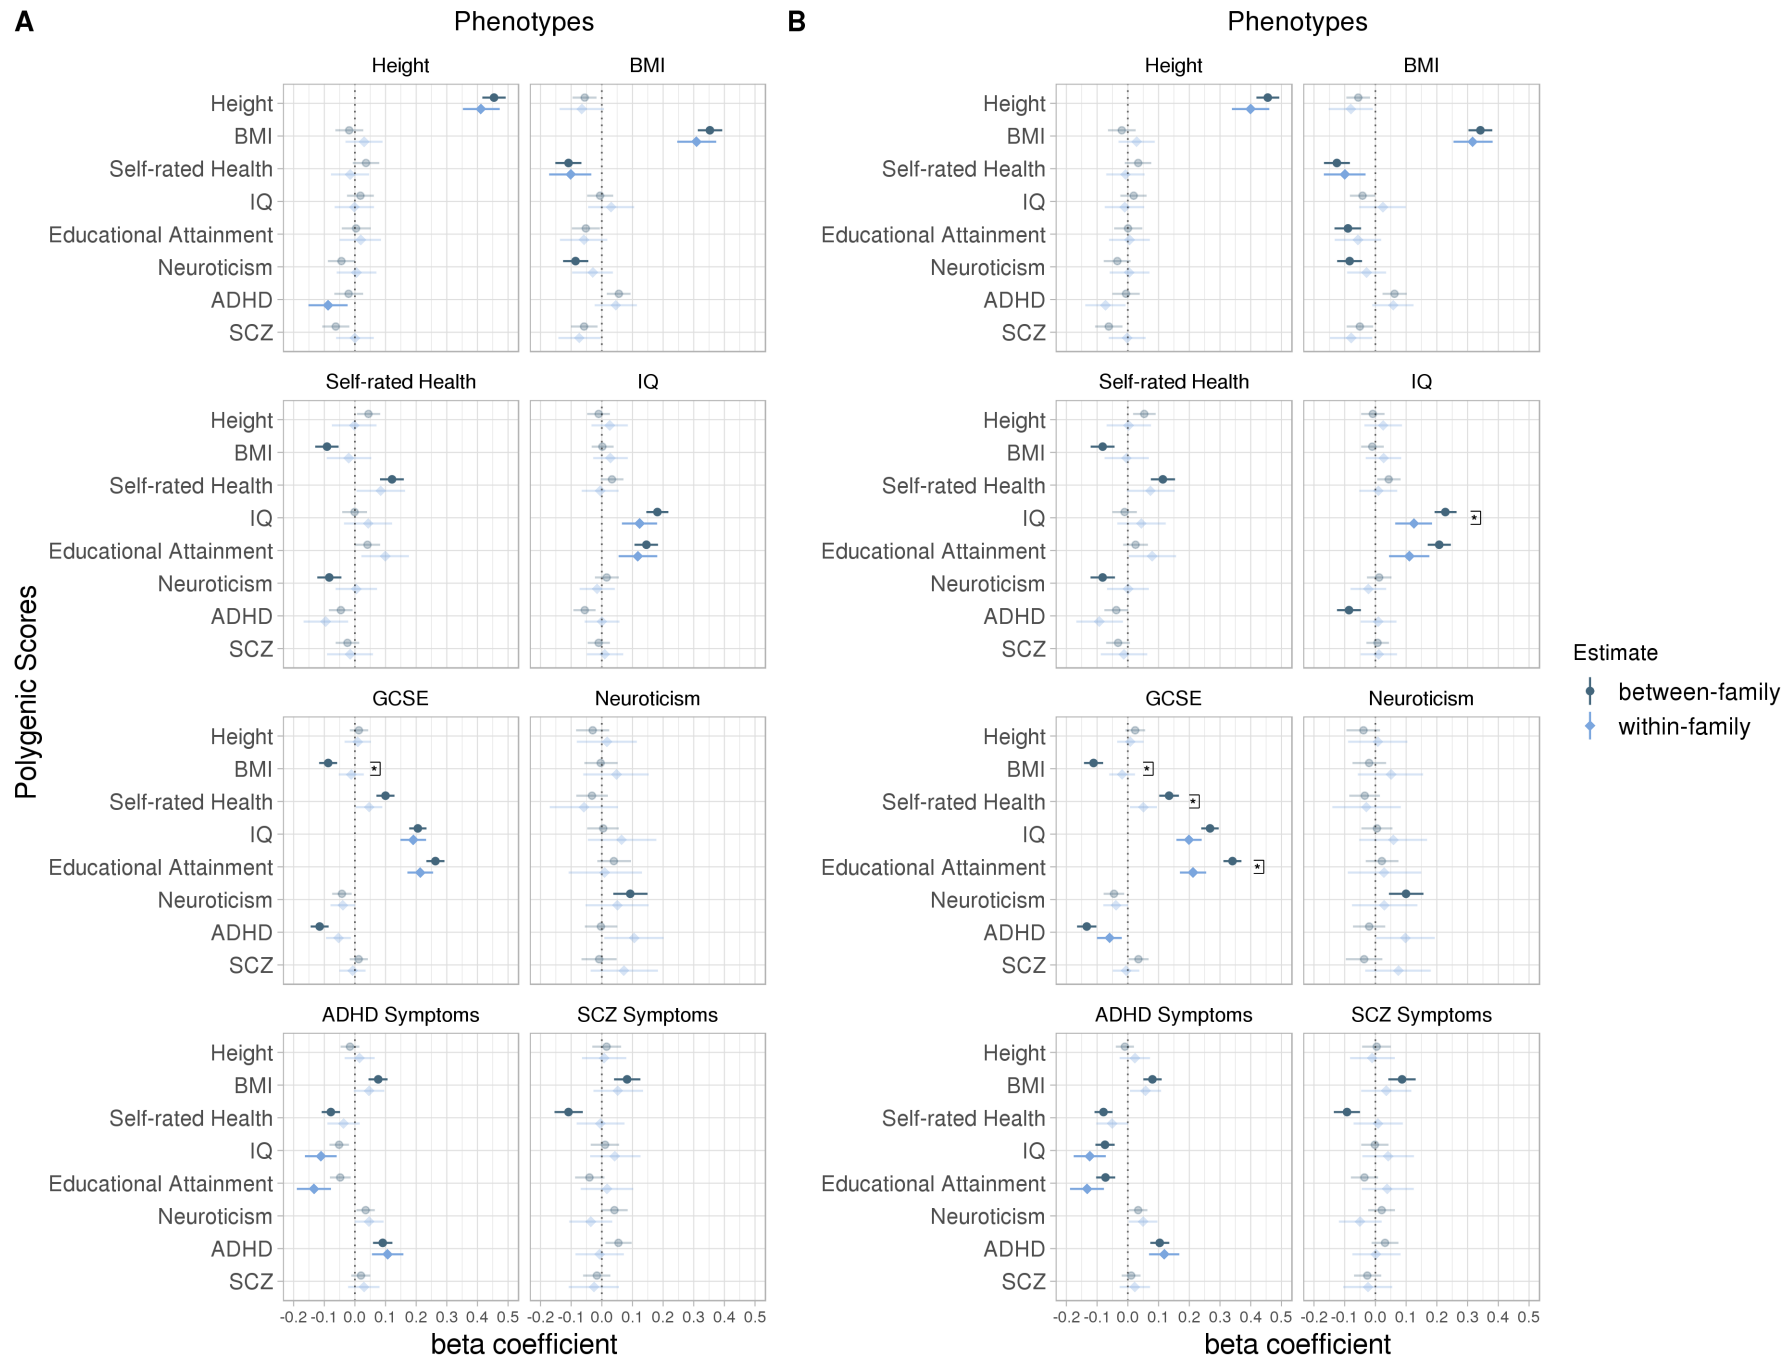

**Note.** Within- and between-family prediction estimates of eight developmental outcomes using eight polygenic scores after statistically correcting for (A) parental education and (B) parental occupation. Genome-wide Polygenic Scores are presented on the y-axis, predicting each of the eight phenotypic traits. Error bars are 95% bootstrap percentile intervals based on 10,000 bootstrap samples (random resampling of DZ twin pairs with replacement). Opaque estimates indicate statistical significance at the false discovery rate corrected threshold of  $p < 0.01$ . Brackets indicate a significant difference between within- and between-family prediction estimate, and only significant differences are shown where at least one of the estimates is significant at the false discovery rate corrected threshold of  $p < 0.01$ . The dotted line represents a beta coefficient of zero. BMI = Body Mass Index; IQ = Intelligence; GCSE = General Certificate of Secondary Education (educational achievement); ADHD = Attention-Deficit/Hyperactivity Disorder; SCZ = Schizophrenia

Figure S4. Within- and between-family prediction estimates for same-sex twin pairs

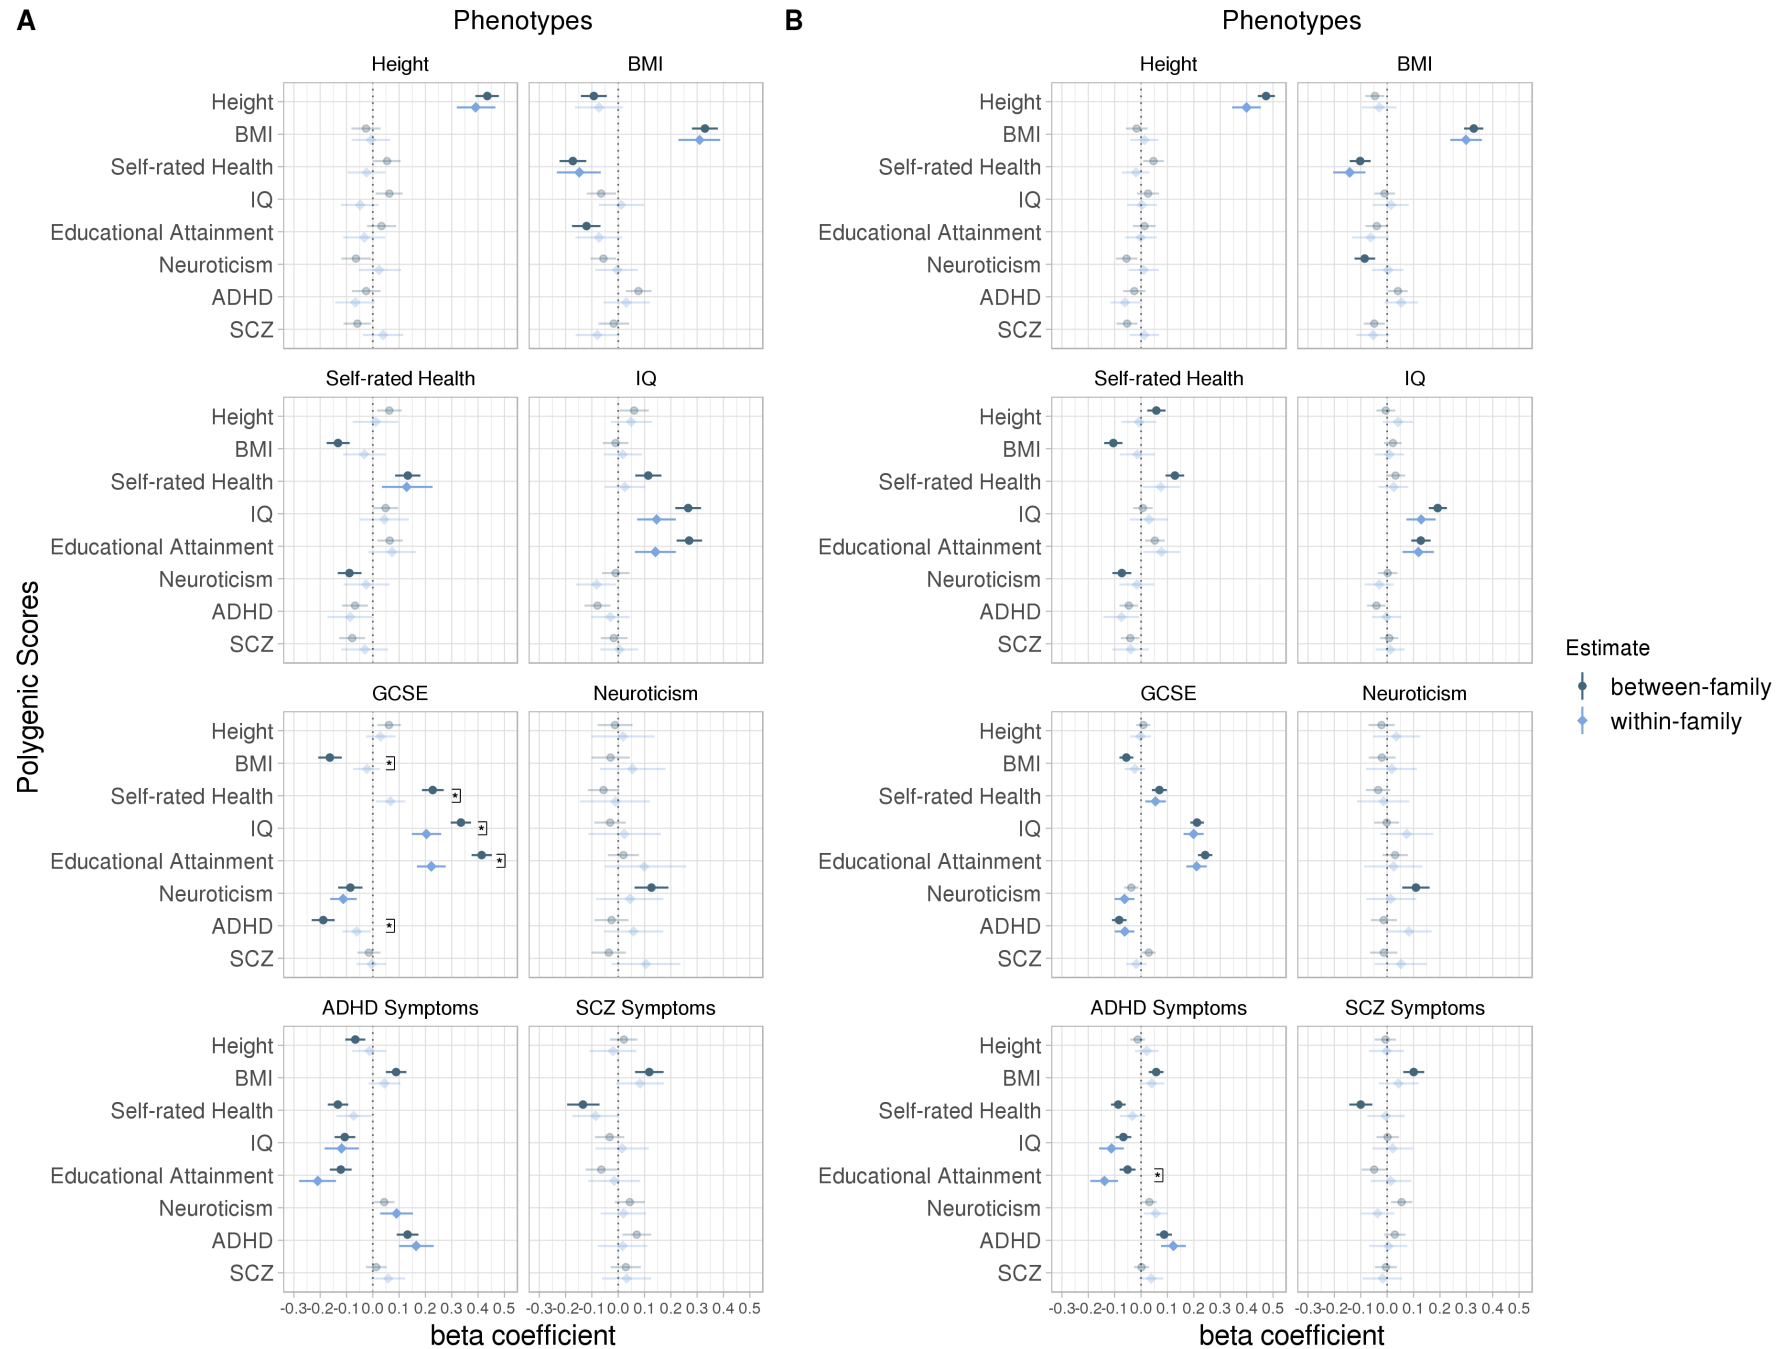

**Note.** Within- and between-family prediction estimates of eight developmental outcomes using eight polygenic scores before (A) and after (B) statistical correction for family socio-economic status, based on same-sex twin pairs only. Genome-wide Polygenic Scores are presented on the y-axis, predicting each of the eight phenotypic traits. Error bars are 95% bootstrap percentile intervals based on 10,000 bootstrap samples (random resampling of DZ twin pairs with replacement). Opaque estimates indicate statistical significance at the false discovery rate corrected threshold of  $p < 0.01$ . Brackets indicate a significant difference between within- and between-family prediction estimate, and only significant differences are shown where at least one of the estimates is significant at the false discovery rate corrected threshold of  $p < 0.01$ . The dotted line represents a beta coefficient of zero. BMI = Body Mass Index; IQ = Intelligence; GCSE = General Certificate of Secondary Education (educational achievement); ADHD = Attention-Deficit/Hyperactivity Disorder; SCZ = Schizophrenia.



Figure S5. Within- and between-family prediction estimates for opposite-sex twin pairs

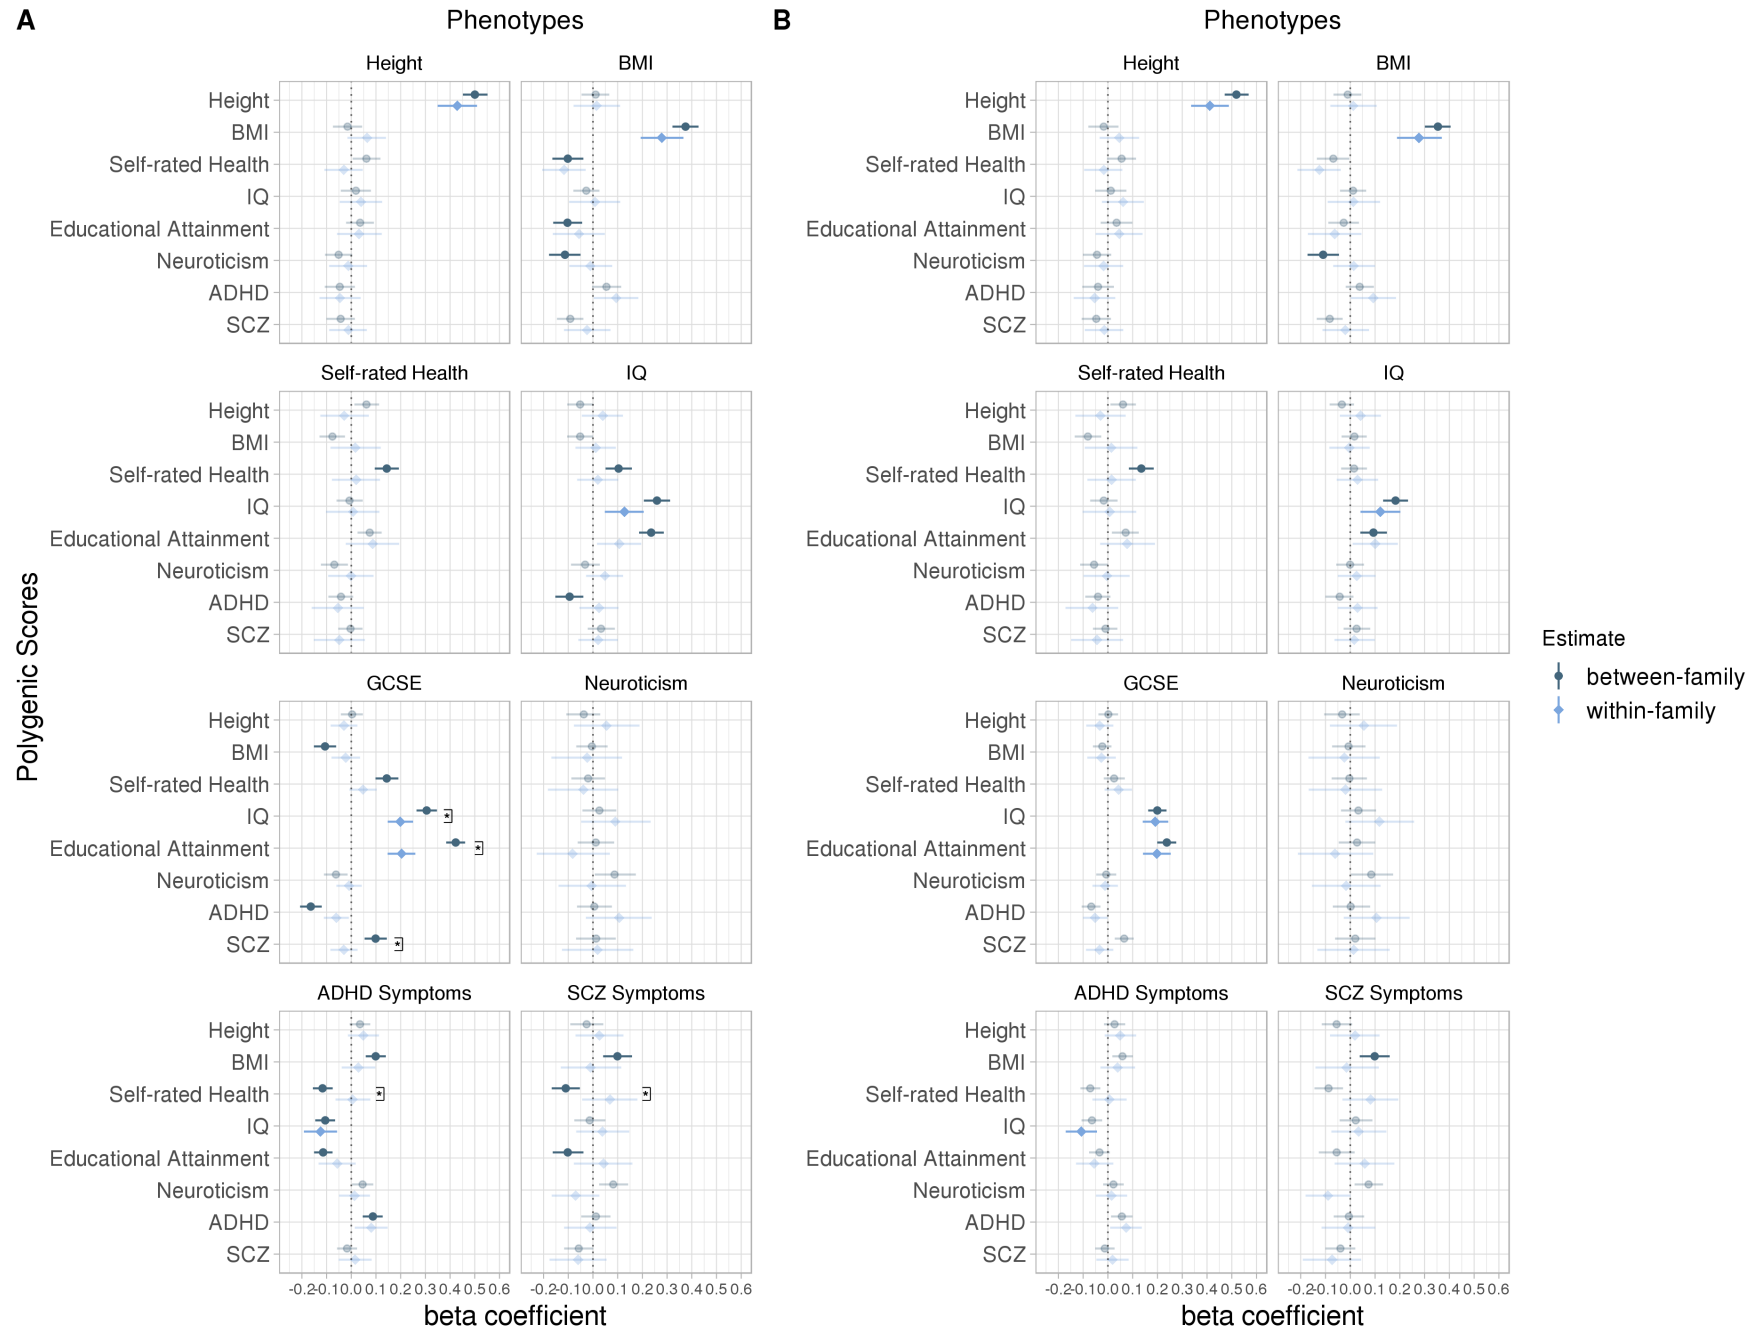

**Note.** Within- and between-family prediction estimates of eight developmental outcomes using eight polygenic scores before (A) and after (B) statistical correction for family socio-economic status, based on opposite-sex twin pairs only. Genome-wide Polygenic Scores are presented on the y-axis, predicting each of the eight phenotypic traits. Error bars are 95% bootstrap percentile intervals based on 10,000 bootstrap samples (random resampling of DZ twin pairs with replacement). Opaque estimates indicate statistical significance at the false discovery rate corrected threshold of  $p < 0.01$ . Brackets indicate a significant difference between within- and between-family prediction estimate, and only significant differences are shown where at least one of the estimates is significant at the false discovery rate corrected threshold of  $p < 0.01$ . The dotted line represents a beta coefficient of zero. BMI = Body Mass Index; IQ = Intelligence; GCSE = General Certificate of Secondary Education (educational achievement); ADHD = Attention-Deficit/Hyperactivity Disorder; SCZ = Schizophrenia.

Figure S6. Within- and between-family prediction estimates based on twin pairs genotyped on OEE chip

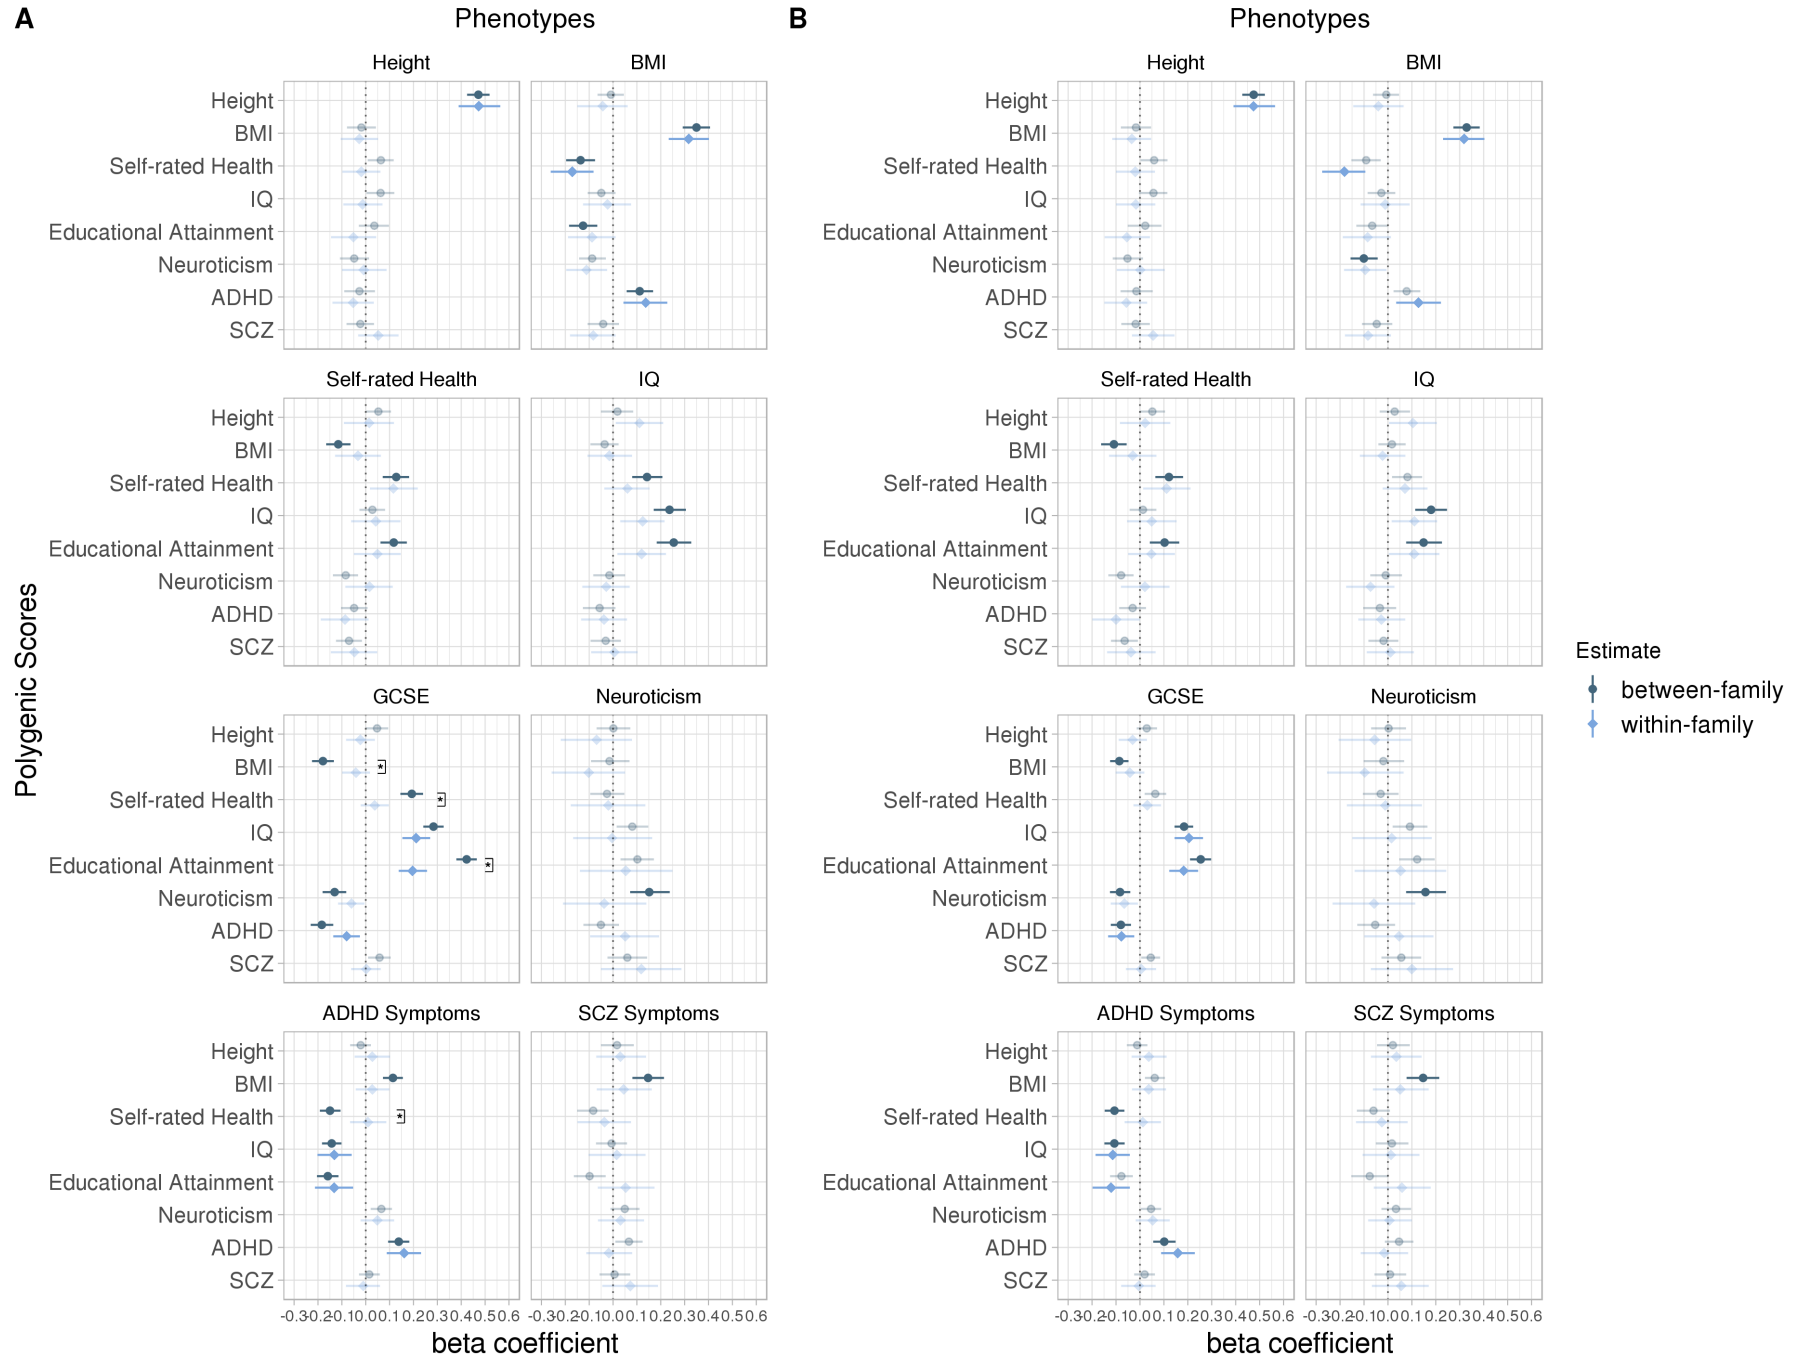

**Note.** Within- and between-family prediction estimates of eight developmental outcomes using eight polygenic scores before (A) and after (B) statistical correction for family socio-economic status, based on twin pairs genotyped on OEE chip. Genome-wide Polygenic Scores are presented on the y-axis, predicting each of the eight phenotypic traits. Error bars are 95% bootstrap percentile intervals based on 10,000 bootstrap samples (random resampling of DZ twin pairs with replacement). Opaque estimates indicate statistical significance at the false discovery rate corrected threshold of  $p < 0.01$ . Brackets indicate a significant difference between within- and between-family prediction estimate, and only significant differences are shown where at least one of the estimates is significant at the false discovery rate corrected threshold of  $p < 0.01$ . The dotted line represents a beta coefficient of zero. BMI = Body Mass Index; IQ = Intelligence; GCSE = General Certificate of Secondary Education (educational achievement); ADHD = Attention-Deficit/Hyperactivity Disorder; SCZ = Schizophrenia.

Figure S7. Within- and between-family prediction estimates based on twin pairs genotyped on OEE chip and the co-twin genotyped on the Affymetrix chip

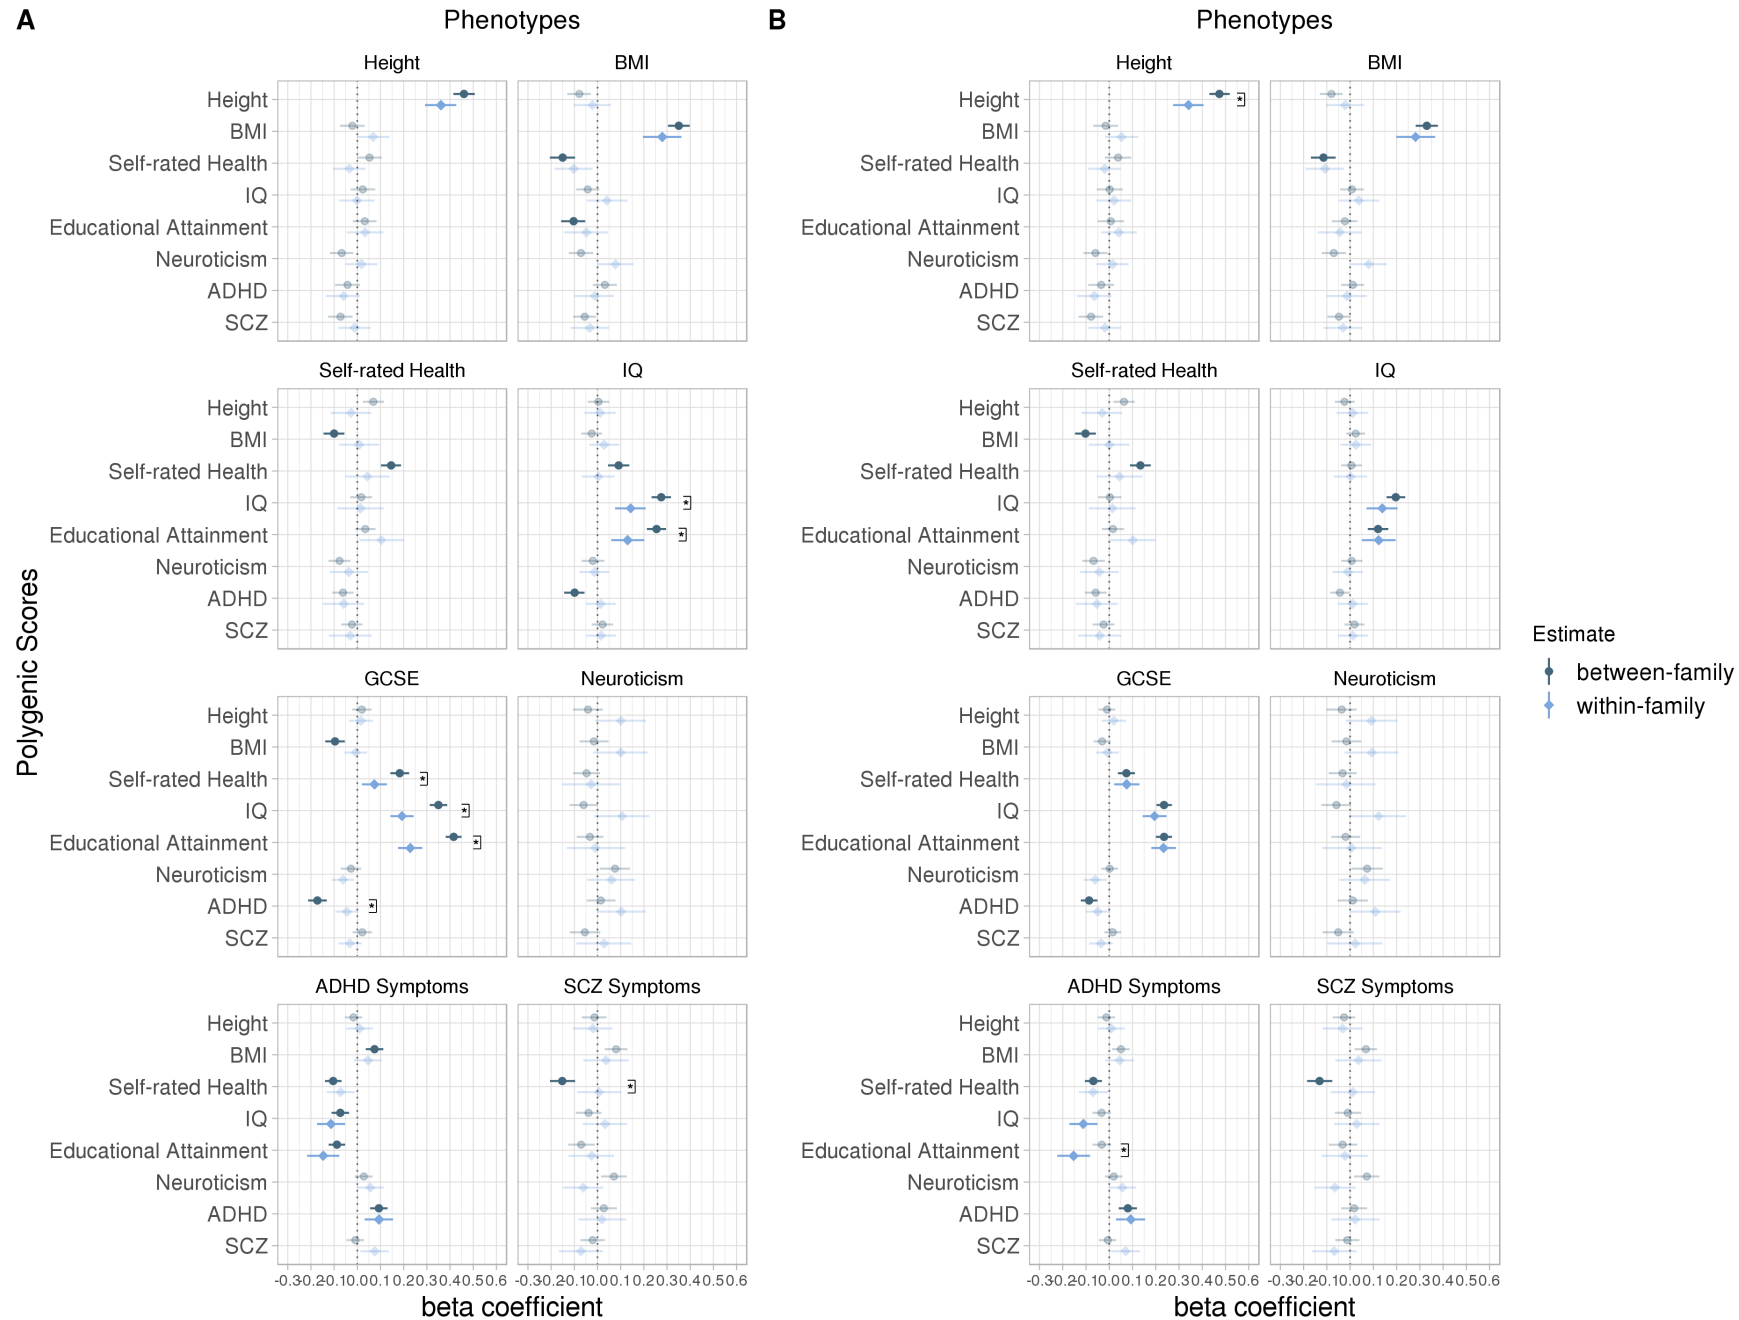

**Note.** Within- and between-family prediction estimates of eight developmental outcomes using eight polygenic scores before (A) and after (B) statistical correction for family socio-economic status, based on twin pairs with one twin genotyped on OEE chip and the other twin genotyped on Affymetrix chip. Genome-wide Polygenic Scores are presented on the y-axis, predicting each of the eight phenotypic traits. Error bars are 95% bootstrap percentile intervals based on 10,000 bootstrap samples (random resampling of DZ twin pairs with replacement). Opaque estimates indicate statistical significance at the false discovery rate corrected threshold of  $p < 0.01$ . Brackets indicate a significant difference between within- and between-family prediction estimate, and only significant differences are shown where at least one of the estimates is significant at the false discovery rate corrected threshold of  $p < 0.01$ . The dotted line represents a beta coefficient of zero. BMI = Body Mass Index; IQ = Intelligence; GCSE = General Certificate of Secondary Education (educational achievement); ADHD = Attention-Deficit/Hyperactivity Disorder; SCZ = Schizophrenia

Figure S8. Within- and between-family coefficients estimated using a SNP-kinship matrix as random effect

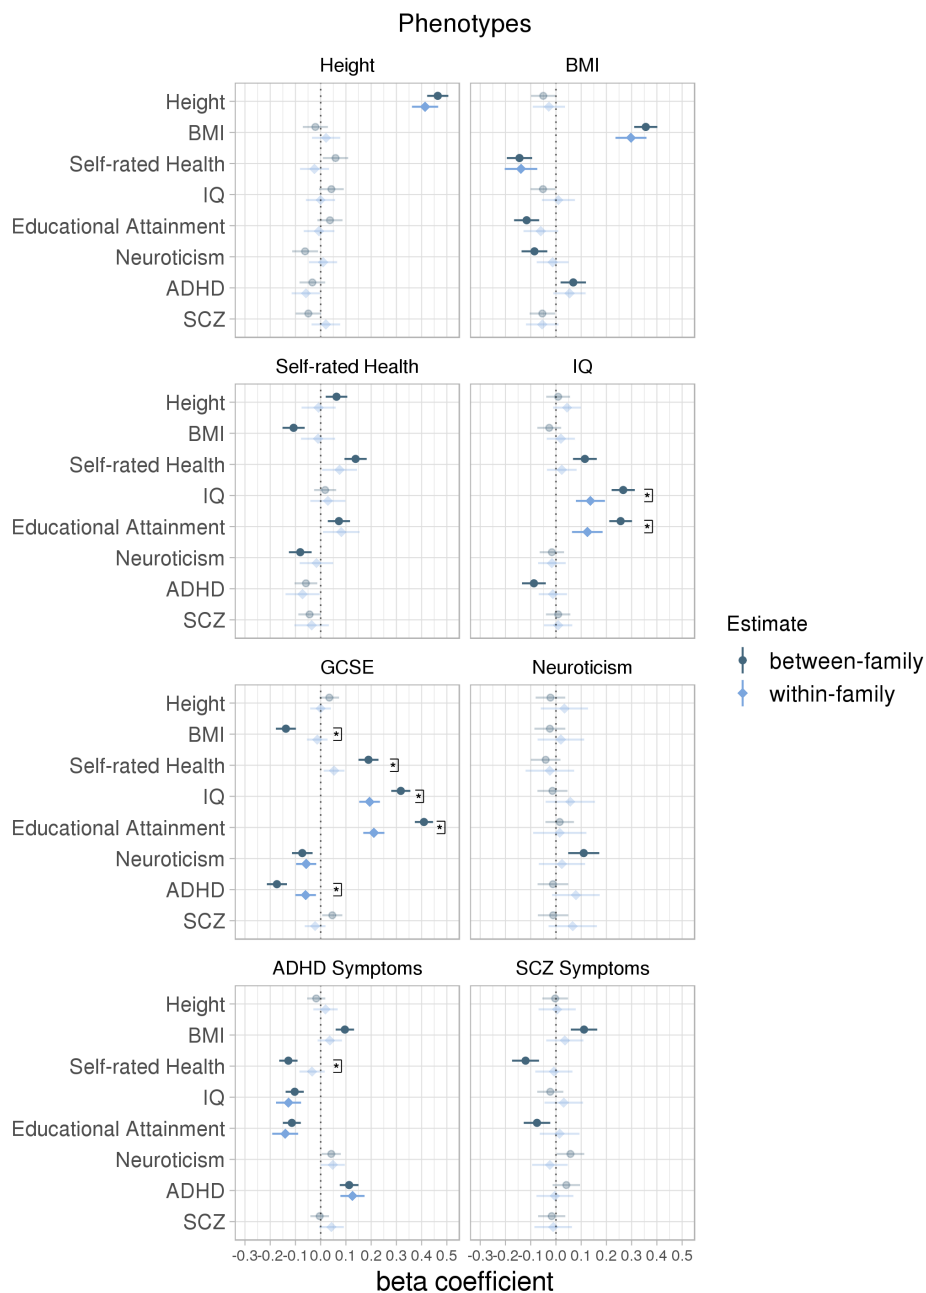

**Note.** Within- and between-family prediction estimates of eight developmental outcomes using eight polygenic scores. Genome-wide Polygenic Scores are presented on the y-axis, predicting each of the eight phenotypic traits. Error bars are 95% confidence intervals calculated using the standard errors of the fixed effects. Opaque estimates indicate statistical significance at the false discovery rate corrected threshold of  $p < 0.01$ . Brackets indicate a significant difference between within- and between-family prediction estimate, and only significant differences are shown where at least one of the estimates is significant at the false discovery rate corrected threshold of  $p < 0.01$ . The dotted line represents a beta coefficient of zero. BMI = Body Mass Index; IQ = Intelligence; GCSE = General Certificate of Secondary Education (educational achievement); ADHD = Attention-Deficit/Hyperactivity Disorder; SCZ = Schizophrenia.

Figure S9. Within- and between-family prediction estimates using polygenic scores calculated with causal fraction of markers of 0.1

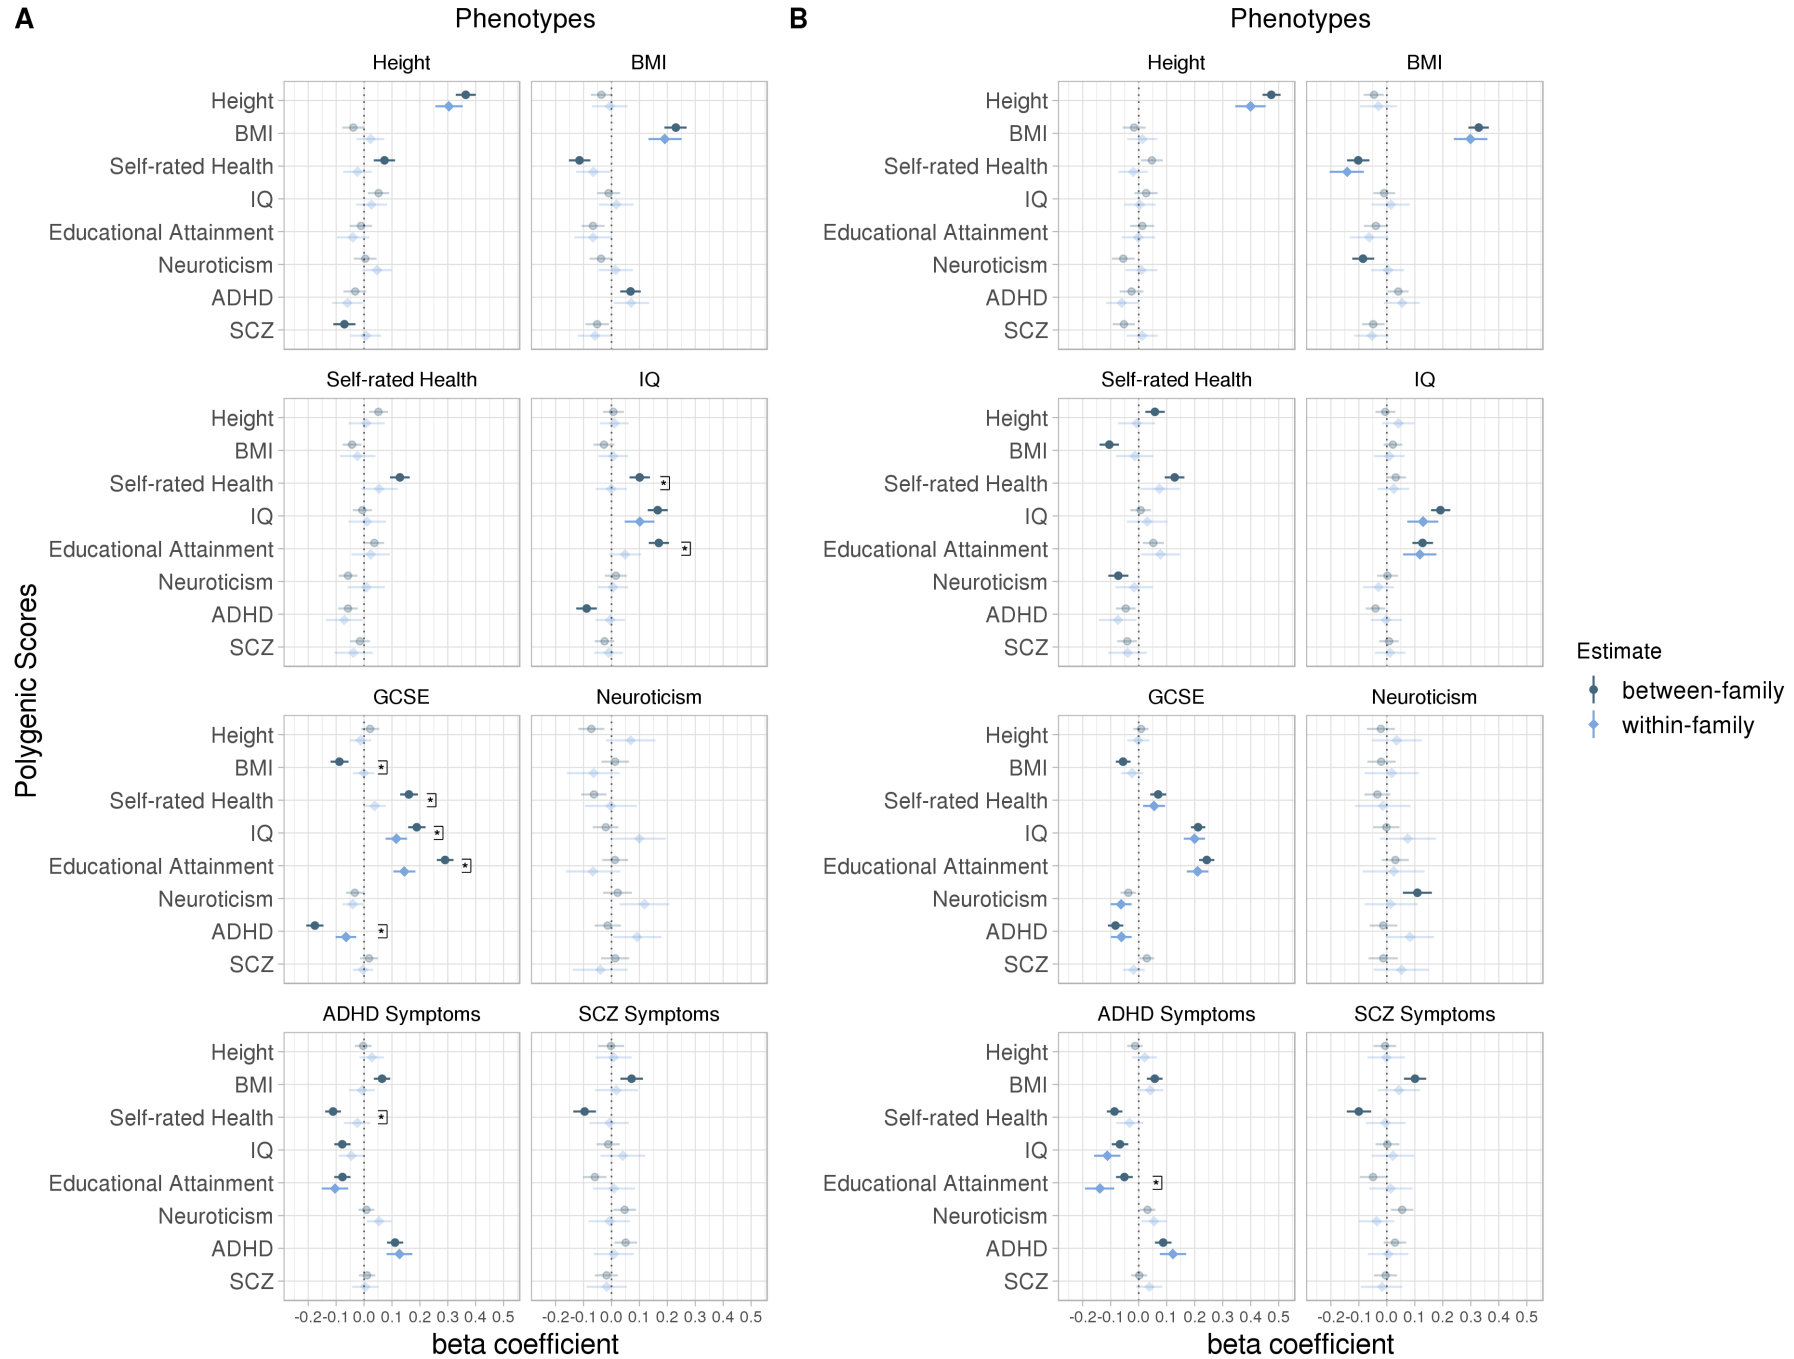



**Note.** Within- and between-family prediction estimates of eight developmental outcomes using eight polygenic scores before (A) and after (B) statistical correction for family socio-economic status, using polygenic scores calculated with causal fraction of markers of 0.1. Genome-wide Polygenic Scores are presented on the y-axis, predicting each of the eight phenotypic traits. Error bars are 95% bootstrap percentile intervals based on 10,000 bootstrap samples (random resampling of DZ twin pairs with replacement). Opaque estimates indicate statistical significance at the false discovery rate corrected threshold of  $p < 0.01$ . Brackets indicate a significant difference between within- and between-family prediction estimate, and only significant differences are shown where at least one of the estimates is significant at the false discovery rate corrected threshold of  $p < 0.01$ . The dotted line represents a beta coefficient of zero. BMI = Body Mass Index; IQ = Intelligence; GCSE = General Certificate of Secondary Education (educational achievement); ADHD = Attention-Deficit/Hyperactivity Disorder; SCZ = Schizophrenia.

Figure S10. Within- and between-family prediction estimates based on polygenic scores with UK Biobank or all UK discovery samples removed

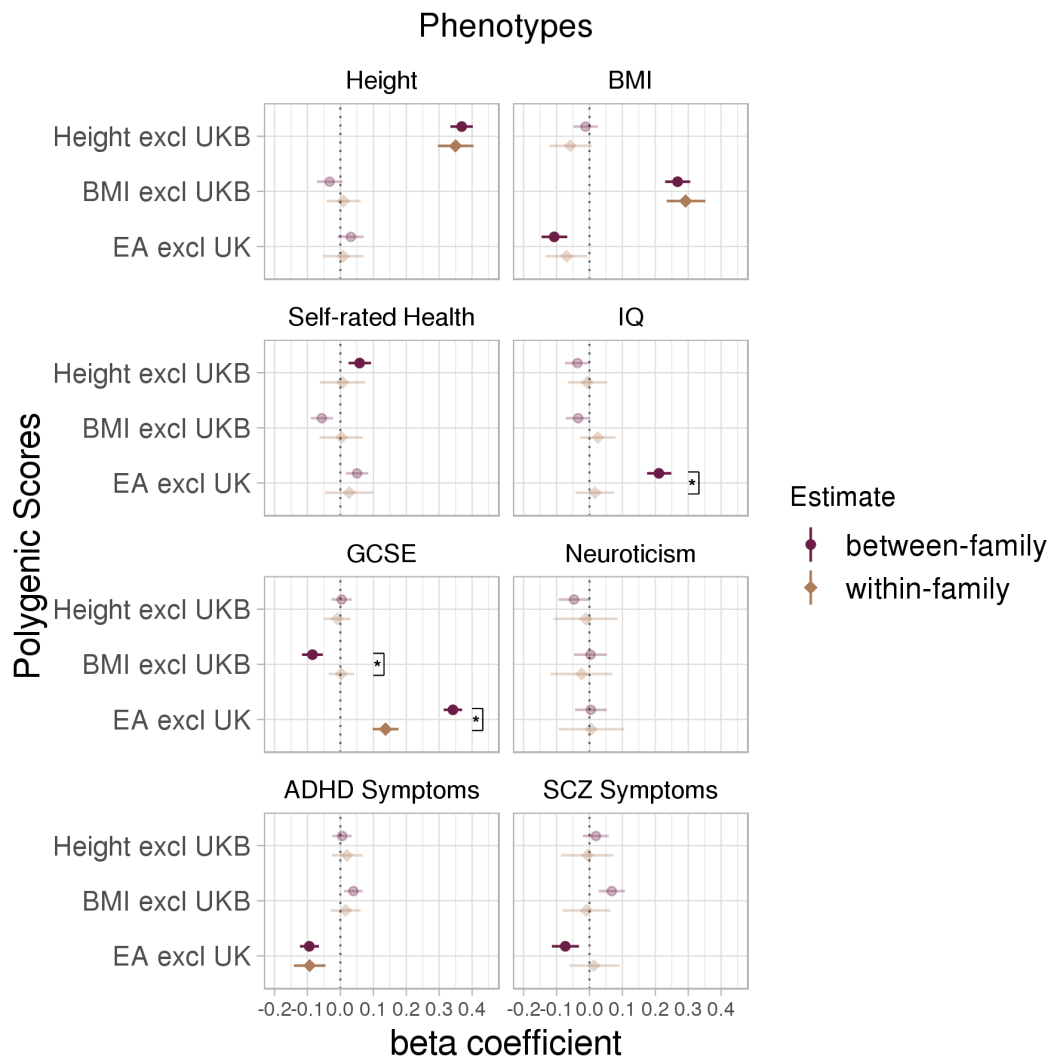

**Note.** Within- and between-family prediction estimates of eight developmental outcomes in using polygenic scores with UK Biobank or all UK samples removed at discovery stage. Genome-wide Polygenic Scores are presented on the y-axis, predicting each of the eight phenotypic traits. Error bars are 95% bootstrap percentile intervals based on 10,000 bootstrap samples (random resampling of DZ twin pairs with replacement). Opaque estimates indicate statistical significance at the false discovery rate corrected threshold of  $p < 0.01$ . Brackets indicate a significant difference between within- and between-family prediction estimate, and only significant differences are shown where at least one of the estimates is significant at the false discovery rate corrected threshold of  $p < 0.01$ . The dotted line represents a beta coefficient of zero. BMI = Body Mass Index; IQ = Intelligence; GCSE = General Certificate of Secondary Education (educational achievement); ADHD = Attention-Deficit/Hyperactivity Disorder; SCZ = Schizophrenia; EA = Educational Attainment; UKB = UK Biobank.

## Supplementary Tables

Table S1. Descriptive statistics, age and sex effects for phenotypes

|                          | <b>N Pairs</b> | <b>Mean</b> | <b>SD</b> | <b>Skew</b> | <b>Min</b> | <b>Max</b> | <b>F sex</b> | <b>P sex</b> | <b>R<sup>2</sup> sex</b> | <b>F age</b> | <b>P age</b> | <b>R<sup>2</sup> age</b> | <b>P order</b> | <b>R<sup>2</sup> order</b> |
|--------------------------|----------------|-------------|-----------|-------------|------------|------------|--------------|--------------|--------------------------|--------------|--------------|--------------------------|----------------|----------------------------|
| <b>Height</b>            | 1,463          | 171.997     | 10.457    | 0.142       | 132        | 211        | 1,460.639    | < 0.001      | 0.500                    | 0.855        | 0.355        | 0.001                    | 0.174          | <0.001                     |
| <b>BMI</b>               | 1,353          | 23.495      | 4.676     | 1.520       | 12.061     | 47.477     | 0.002        | 0.964        | <0.001                   | 16.470       | < 0.001      | 0.012                    | 0.918          | <0.001                     |
| <b>Self-rated Health</b> | 1,494          | 3.480       | 0.672     | -0.330      | 1.000      | 5.000      | 8.188        | 0.004        | 0.005                    | 1.457        | 0.228        | 0.001                    | 0.987          | <0.001                     |
| <b>IQ</b>                | 1,569          | 0.117       | 0.954     | -0.242      | -3.441     | 3.040      | 7.277        | 0.007        | 0.005                    | 104.278      | < 0.001      | 0.062                    | 0.125          | <0.001                     |
| <b>GCSE</b>              | 2,366          | 8.952       | 1.194     | -0.330      | 4.670      | 11.000     | 1.814        | 0.178        | <0.001                   | 4.49         | 0.034        | 0.001                    | 0.487          | <0.001                     |
| <b>Neuroticism</b>       | 789            | 2.583       | 0.655     | 0.280       | 1.000      | 5.000      | 31.894       | < 0.001      | 0.039                    | 2.202        | 0.138        | 0.003                    | 0.740          | <0.001                     |
| <b>ADHD Symptoms</b>     | 2,469          | 0.063       | 1.002     | 1.357       | -1.371     | 5.066      | 159.896      | < 0.001      | 0.061                    | 16.877       | < 0.001      | 0.007                    | 0.073          | <0.001                     |
| <b>SCZ Symptoms</b>      | 1,140          | -0.026      | 0.705     | 1.560       | -0.816     | 4.093      | 2.041        | 0.153        | 0.002                    | 6.122        | 0.013        | 0.005                    | 0.858          | <0.001                     |
| <b>SES</b>               | 2,962          | 0.209       | 0.994     | 0.046       | -2.351     | 2.495      | --           | --           | --                       | --           | --           | --                       | --             | --                         |

**Note.** Means and standard deviations for individual measures are calculated based on raw data. Height, BMI, self-reported health, GCSE grades and neuroticism means and standard deviations are reported on their original scale. IQ, ADHD symptoms, schizophrenia symptoms and socioeconomic status are reported on the z-scale as standardization was required to form the composite. Sex, age and birth order tests were performed on one randomly selected twin per pair. R<sup>2</sup>= proportion of variance explained. Order = birth order; BMI = Body Mass Index; IQ = Intelligence; GCSE = General Certificate of Secondary Education (educational achievement); ADHD = Attention-Deficit/Hyperactivity Disorder; SCZ = Schizophrenia; SES = family socio-economic status.

Table S2. GWAS used for polygenic score calculation

| Trait                               | Year | SNP-h <sup>2</sup>        | GPS R <sup>2</sup> | Cases  | Controls | GWAS sample size | Overlapping SNPs <sup>a</sup> | Notes                                     |
|-------------------------------------|------|---------------------------|--------------------|--------|----------|------------------|-------------------------------|-------------------------------------------|
| BMI <sup>2</sup>                    | 2018 | 22.4% (3.7%) <sup>2</sup> | 10.2% <sup>2</sup> | -      | -        | 681,275          | 424,816                       | -                                         |
| Height <sup>2</sup>                 | 2018 | 48.3% (3.7%) <sup>2</sup> | 24.4% <sup>2</sup> | -      | -        | 693,529          | 427,030                       | -                                         |
| Self-rated health <sup>3</sup>      | 2018 | 13% (0.6%) <sup>4</sup>   | --                 | -      | -        | 337,199          | 499,422                       | -                                         |
| Intelligence <sup>5</sup>           | 2018 | 19% (1%) <sup>5</sup>     | 6.7% <sup>6</sup>  | -      | -        | 266,453          | 497,059                       | GWAS re-run excluding TEDS sample (3,414) |
| Educational Attainment <sup>7</sup> | 2018 | 12.2% (0.3%) <sup>7</sup> | 11.4% <sup>7</sup> | -      | -        | 766,345          | 496,633                       | -                                         |
| Neuroticism <sup>8</sup>            | 2017 | 10.8% (0.5%) <sup>8</sup> | 2.8% <sup>8</sup>  | -      | -        | 329,821          | 500,849                       | -                                         |
| ADHD <sup>9</sup>                   | 2019 | 21.6% (1.4%) <sup>9</sup> | 5.5% <sup>9</sup>  | 20,183 | 35,191   | 55,374           | 469,352                       | -                                         |
| Schizophrenia <sup>10</sup>         | 2018 | 20% (0.6%) <sup>10</sup>  | 5.7% <sup>10</sup> | 40,675 | 64,643   | 105,318          | 487,423                       | -                                         |

**Note.** H<sup>2</sup> = heritability; R<sup>2</sup> = phenotypic variance explained; <sup>a</sup> = number of overlapping SNPs between GWA studies and TEDS individual-level genotype data.

Table S3. Intraclass coefficients for same-sex and opposite-sex twin pairs

| Phenotype                | Same-sex twin pairs |       |              |              | Opposite-sex twin pairs |       |              |              |
|--------------------------|---------------------|-------|--------------|--------------|-------------------------|-------|--------------|--------------|
|                          | N pairs             | ICC   | ICC 95% CI L | ICC 95% CI U | N pairs                 | ICC   | ICC 95% CI L | ICC 95% CI U |
| <b>Height</b>            | 789                 | 0.435 | 0.365        | 0.518        | 674                     | 0.443 | 0.367        | 0.534        |
| <b>BMI</b>               | 733                 | 0.339 | 0.271        | 0.424        | 620                     | 0.286 | 0.215        | 0.381        |
| <b>Self-rated Health</b> | 805                 | 0.182 | 0.124        | 0.266        | 689                     | 0.083 | 0.036        | 0.193        |
| <b>IQ</b>                | 824                 | 0.451 | 0.381        | 0.532        | 745                     | 0.386 | 0.316        | 0.47         |
| <b>GCSE</b>              | 1,220               | 0.579 | 0.517        | 0.647        | 1,146                   | 0.585 | 0.521        | 0.656        |
| <b>Neuroticism</b>       | 429                 | 0.084 | 0.025        | 0.282        | 360                     | 0.123 | 0.054        | 0.281        |
| <b>ADHD Symptoms</b>     | 1,285               | 0.328 | 0.275        | 0.391        | 1,184                   | 0.317 | 0.262        | 0.382        |
| <b>SCZ Symptoms</b>      | 613                 | 0.308 | 0.235        | 0.403        | 527                     | 0.194 | 0.124        | 0.302        |

**Note.** BMI = Body Mass Index; IQ = Intelligence; GCSE = General Certificate of Secondary Education (educational achievement); ADHD = Attention-Deficit/Hyperactivity Disorder; SCZ = Schizophrenia symptoms; EA = Educational Attainment; Neurot = Neuroticism; ICC = Intraclass coefficient; CI = Confidence Interval.

Table S4. Intraclass coefficients for twin pairs split by genotyping chip

| Phenotype                | Twin pairs with both twins genotyped on OEE |       |              |              | Twin pairs with one twin genotyped on OEE and the other twin genotyped on Affy |       |              |              |
|--------------------------|---------------------------------------------|-------|--------------|--------------|--------------------------------------------------------------------------------|-------|--------------|--------------|
|                          | N pairs                                     | ICC   | ICC 95% CI L | ICC 95% CI U | N pairs                                                                        | ICC   | ICC 95% CI L | ICC 95% CI U |
| <b>Height</b>            | 650                                         | 0.401 | 0.326        | 0.492        | 813                                                                            | 0.468 | 0.398        | 0.549        |
| <b>BMI</b>               | 603                                         | 0.331 | 0.257        | 0.426        | 750                                                                            | 0.297 | 0.232        | 0.381        |
| <b>Self-rated Health</b> | 665                                         | 0.172 | 0.111        | 0.267        | 829                                                                            | 0.107 | 0.056        | 0.201        |
| <b>IQ</b>                | 510                                         | 0.391 | 0.308        | 0.496        | 1059                                                                           | 0.437 | 0.376        | 0.508        |
| <b>GCSE</b>              | 1050                                        | 0.57  | 0.504        | 0.644        | 1316                                                                           | 0.59  | 0.531        | 0.656        |
| <b>Neuroticism</b>       | 304                                         | 0     | 0            | 0            | 485                                                                            | 0.167 | 0.098        | 0.284        |
| <b>ADHD Symptoms</b>     | 1047                                        | 0.312 | 0.255        | 0.382        | 1422                                                                           | 0.329 | 0.278        | 0.388        |
| <b>SCZ Symptoms</b>      | 490                                         | 0.241 | 0.165        | 0.35         | 650                                                                            | 0.263 | 0.195        | 0.356        |

**Note.** BMI = Body Mass Index; IQ = Intelligence; GCSE = General Certificate of Secondary Education (educational achievement); ADHD = Attention-Deficit/Hyperactivity Disorder; SCZ = Schizophrenia symptoms; EA = Educational Attainment; Neurot = Neuroticism; ICC = Intraclass coefficient; CI = Confidence Interval; OEE = Illumina HumanOmniExpressExome-8v1.2 chip; Affy = AffymetrixGeneChip 6.0 SNP chip.

Table S5. Intraclass coefficients

| <b>Phenotype</b>         | <b>N pairs</b> | <b>ICC</b> | <b>ICC 95% CI L</b> | <b>ICC 95% CI U</b> |
|--------------------------|----------------|------------|---------------------|---------------------|
| <b>Height</b>            | 1,463          | 0.439      | 0.386               | 0.498               |
| <b>BMI</b>               | 1,353          | 0.317      | 0.265               | 0.379               |
| <b>Self-rated Health</b> | 1,494          | 0.136      | 0.093               | 0.199               |
| <b>IQ</b>                | 1,569          | 0.422      | 0.371               | 0.479               |
| <b>GCSE</b>              | 2,366          | 0.582      | 0.537               | 0.63                |
| <b>Neuroticism</b>       | 789            | 0.103      | 0.055               | 0.193               |
| <b>ADHD Symptoms</b>     | 2,469          | 0.323      | 0.285               | 0.366               |
| <b>SCZ Symptoms</b>      | 1,140          | 0.254      | 0.201               | 0.32                |

**Note.** BMI = Body Mass Index; IQ = Intelligence; GCSE = General Certificate of Secondary Education (educational achievement); ADHD = Attention-Deficit/Hyperactivity Disorder; SCZ = Schizophrenia symptoms; ICC = Intraclass coefficient; CI = Confidence Interval.

Table S12. Within- and between-family prediction estimates of family socio-economic status

| pheno | GPS    | beta.B | L.CI.B | U.CI.B | P.B       | beta.W | L.CI.W | U.CI.W | P.W | P.Diff   |
|-------|--------|--------|--------|--------|-----------|--------|--------|--------|-----|----------|
| SES   | ADHD   | -0.168 | -0.214 | -0.13  | 1.32e-28  | 0      | 0      | 0      | 1   | 2.69e-08 |
| SES   | BMI    | -0.19  | -0.216 | -0.134 | 3.80e-38  | 0      | 0      | 0      | 1   | 1.80e-10 |
| SES   | EA     | 0.433  | 0.409  | 0.479  | 2.35e-204 | 0      | 0      | 0      | 1   | 5.47e-49 |
| SES   | Height | 0.069  | 0.02   | 0.102  | 6.51e-06  | 0      | 0      | 0      | 1   | 0.025    |
| SES   | IQ     | 0.231  | 0.213  | 0.291  | 4.28e-55  | 0      | 0      | 0      | 1   | 7.65e-14 |
| SES   | Neurot | -0.06  | -0.129 | -0.043 | 5.35e-05  | 0      | 0      | 0      | 1   | 0.049    |
| SES   | SCZ    | 0.04   | -0.015 | 0.066  | 0.008     | 0      | 0      | 0      | 1   | 0.201    |
| SES   | SRH    | 0.302  | 0.238  | 0.318  | 3.86e-89  | 0      | 0      | 0      | 1   | 2.24e-23 |

**Note.** SES = family socio-economic status; BMI = Body Mass Index; IQ = Intelligence; GCSE = General Certificate of Secondary Education (educational achievement); ADHD = Attention-Deficit/Hyperactivity Disorder; SCZ = Schizophrenia symptoms; EA = Educational Attainment; Neurot = Neuroticism; SRH = Self-rated Health; B = Between-family estimate; W = Within-family estimate; L.CI = Lower 95% bootstrap percentile interval; U.CI = Upper 95% bootstrap percentile interval; P = statistical significance of beta estimate; P.diff = statistical significance of difference between within- and between-family estimates. Fixed effects are estimated using multiple regression analysis as parental SES is invariant within DZ twin pairs and thus mixed-effects modelling is not possible.



Table S24. Within- and between-family prediction estimates based on polygenic scores with UK Biobank or all UK discovery samples removed

| pheno  | GPS             | beta.B | L.CI.B | U.CI.B | P.B      | beta.W | L.CI.W | U.CI.W | P.W      | TotEff | PercRed | BetaDiff | Diff.L.CI | Diff.U.CI | P.diff   |
|--------|-----------------|--------|--------|--------|----------|--------|--------|--------|----------|--------|---------|----------|-----------|-----------|----------|
| ADHD   | BMI excl UKB    | 0.039  | 0.011  | 0.068  | 3.64e-02 | 0.016  | -0.03  | 0.061  | 5.04e-01 | 0.023  | 60.52   | 0.024    | -0.029    | 0.076     | 4.26e-01 |
| ADHD   | EA excl all UK  | -0.095 | -0.123 | -0.065 | 2.93e-07 | -0.093 | -0.141 | -0.045 | 2.44e-04 | -0.094 | 1.15    | -0.001   | -0.057    | 0.056     | 9.72e-01 |
| ADHD   | Height excl UKB | 0.005  | -0.024 | 0.034  | 7.73e-01 | 0.02   | -0.026 | 0.067  | 4.14e-01 | 0.015  | -274.51 | -0.015   | -0.07     | 0.041     | 6.33e-01 |
| BMI    | BMI excl UKB    | 0.268  | 0.23   | 0.306  | 2.71e-26 | 0.292  | 0.234  | 0.352  | 2.18e-21 | 0.285  | -9.07   | -0.024   | -0.096    | 0.047     | 5.34e-01 |
| BMI    | EA excl all UK  | -0.107 | -0.145 | -0.067 | 2.15e-05 | -0.069 | -0.133 | -0.006 | 4.56e-02 | -0.081 | 35.51   | -0.038   | -0.111    | 0.037     | 3.73e-01 |
| BMI    | Height excl UKB | -0.012 | -0.049 | 0.025  | 6.18e-01 | -0.058 | -0.121 | 0.007  | 8.12e-02 | -0.043 | -370.21 | 0.046    | -0.028    | 0.118     | 2.70e-01 |
| GCSE   | BMI excl UKB    | -0.085 | -0.117 | -0.053 | 7.53e-05 | 0.003  | -0.036 | 0.04   | 8.87e-01 | -0.048 | 103.15  | -0.088   | -0.136    | -0.039    | 2.08e-03 |
| GCSE   | EA excl all UK  | 0.342  | 0.314  | 0.37   | 3.23e-64 | 0.137  | 0.098  | 0.177  | 2.15e-11 | 0.249  | 59.88   | 0.205    | 0.155     | 0.254     | 4.46e-13 |
| GCSE   | Height excl UKB | 0.004  | -0.027 | 0.034  | 8.58e-01 | -0.01  | -0.051 | 0.031  | 6.16e-01 | -0.002 | 369.05  | 0.014    | -0.037    | 0.064     | 6.33e-01 |
| SRH    | BMI excl UKB    | -0.056 | -0.09  | -0.023 | 1.27e-02 | 0.004  | -0.064 | 0.068  | 9.06e-01 | -0.004 | 106.98  | -0.06    | -0.132    | 0.016     | 1.34e-01 |
| SRH    | EA excl all UK  | 0.051  | 0.016  | 0.085  | 2.51e-02 | 0.027  | -0.047 | 0.1    | 4.66e-01 | 0.03   | 46.46   | 0.023    | -0.057    | 0.105     | 5.88e-01 |
| SRH    | Height excl UKB | 0.058  | 0.025  | 0.093  | 7.49e-03 | 0.007  | -0.063 | 0.076  | 8.48e-01 | 0.014  | 88.27   | 0.052    | -0.025    | 0.129     | 2.18e-01 |
| Height | BMI excl UKB    | -0.033 | -0.071 | 0.007  | 2.04e-01 | 0.009  | -0.042 | 0.062  | 7.39e-01 | -0.009 | 127.78  | -0.042   | -0.108    | 0.024     | 2.65e-01 |
| Height | EA excl all UK  | 0.032  | -0.009 | 0.071  | 2.16e-01 | 0.009  | -0.053 | 0.07   | 7.77e-01 | 0.019  | 73.04   | 0.023    | -0.05     | 0.095     | 5.59e-01 |
| Height | Height excl UKB | 0.368  | 0.334  | 0.402  | 6.29e-54 | 0.35   | 0.296  | 0.404  | 4.03e-35 | 0.358  | 5.02    | 0.019    | -0.047    | 0.083     | 6.05e-01 |
| IQ     | BMI excl UKB    | -0.034 | -0.072 | 0.002  | 1.65e-01 | 0.025  | -0.028 | 0.079  | 3.44e-01 | 0      | 173.67  | -0.06    | -0.125    | 0.007     | 1.01e-01 |
| IQ     | EA excl all UK  | 0.211  | 0.175  | 0.249  | 1.27e-18 | 0.017  | -0.042 | 0.075  | 5.63e-01 | 0.095  | 91.83   | 0.194    | 0.126     | 0.265     | 3.41e-07 |
| IQ     | Height excl UKB | -0.037 | -0.074 | 0.001  | 1.33e-01 | -0.007 | -0.065 | 0.054  | 8.21e-01 | -0.019 | 82.19   | -0.03    | -0.1      | 0.038     | 4.25e-01 |
| Neurot | BMI excl UKB    | 0.003  | -0.047 | 0.053  | 9.15e-01 | -0.024 | -0.118 | 0.07   | 6.11e-01 | -0.021 | 825.01  | 0.027    | -0.08     | 0.134     | 6.27e-01 |
| Neurot | EA excl all UK  | 0.004  | -0.044 | 0.053  | 8.88e-01 | 0.005  | -0.093 | 0.105  | 9.17e-01 | 0.005  | -25.51  | -0.001   | -0.112    | 0.109     | 9.85e-01 |
| Neurot | Height excl UKB | -0.047 | -0.093 | 0.001  | 1.12e-01 | -0.011 | -0.11  | 0.086  | 8.27e-01 | -0.015 | 76.63   | -0.036   | -0.143    | 0.073     | 5.36e-01 |
| SCZ    | BMI excl UKB    | 0.068  | 0.028  | 0.107  | 1.40e-02 | -0.01  | -0.083 | 0.064  | 7.88e-01 | 0.01   | 114.1   | 0.077    | -0.01     | 0.163     | 8.55e-02 |

|     |                 |        |        |        |          |        |        |       |          |        |        |        |        |       |          |
|-----|-----------------|--------|--------|--------|----------|--------|--------|-------|----------|--------|--------|--------|--------|-------|----------|
| SCZ | EA excl all UK  | -0.073 | -0.114 | -0.032 | 6.90e-03 | 0.014  | -0.061 | 0.092 | 7.31e-01 | -0.008 | 118.91 | -0.087 | -0.178 | 0.002 | 7.22e-02 |
| SCZ | Height excl UKB | 0.019  | -0.02  | 0.058  | 4.57e-01 | -0.005 | -0.086 | 0.073 | 8.92e-01 | 0.001  | 126.82 | 0.025  | -0.062 | 0.112 | 5.96e-01 |

**Note.** BMI = Body Mass Index; IQ = Intelligence; GCSE = General Certificate of Secondary Education (educational achievement); ADHD = Attention-Deficit/Hyperactivity Disorder; SCZ = Schizophrenia symptoms; EA = Educational Attainment; Neurot = Neuroticism; SRH = Self-rated Health; UKB = UK Biobank; B = Between-family estimate; W = Within-family estimate; L.CI = Lower 95% bootstrap percentile interval; U.CI = Upper 95% bootstrap percentile interval; P = statistical significance of beta estimate; TotEff = Total effect derived as the intra-class correlation weighted sum of the within- and between family effect. PercRed = Reduction of prediction estimates when comparing within- to between-family estimates in percentage. BetaDiff = Difference of between-family and within-family beta coefficient; P.diff = statistical significance of difference between within- and between-family estimates.

Table S25 Phenotypic and polygenic score mean differences by polygenic score difference quantiles

| phenotype | GPS quant | mean phen | CI.L   | CI.U   | mean GPS | CI.L   | CI.U  |
|-----------|-----------|-----------|--------|--------|----------|--------|-------|
| Height    | 1         | 0.270     | -1.339 | 1.880  | -0.004   | -0.016 | 0.008 |
| Height    | 2         | 1.718     | 0.203  | 3.233  | -0.003   | -0.033 | 0.027 |
| Height    | 3         | 2.435     | 0.738  | 4.132  | 0.020    | -0.030 | 0.071 |
| Height    | 4         | 3.489     | 2.039  | 4.939  | -0.030   | -0.102 | 0.041 |
| Height    | 5         | 1.433     | -0.209 | 3.075  | 0.066    | -0.025 | 0.158 |
| Height    | 6         | 1.452     | -0.144 | 3.048  | 0.019    | -0.101 | 0.139 |
| Height    | 7         | 4.620     | 2.862  | 6.379  | -0.007   | -0.154 | 0.141 |
| Height    | 8         | 3.649     | 1.813  | 5.485  | -0.038   | -0.218 | 0.142 |
| Height    | 9         | 7.021     | 5.316  | 8.727  | 0.065    | -0.165 | 0.295 |
| Height    | 10        | 8.989     | 7.181  | 10.798 | -0.090   | -0.422 | 0.242 |
| BMI       | 1         | 0.064     | -0.843 | 0.972  | 0.001    | -0.012 | 0.014 |
| BMI       | 2         | 0.968     | 0.126  | 1.810  | 0.004    | -0.029 | 0.037 |
| BMI       | 3         | -0.555    | -1.439 | 0.329  | -0.011   | -0.066 | 0.044 |
| BMI       | 4         | 1.204     | 0.319  | 2.089  | -0.027   | -0.105 | 0.051 |
| BMI       | 5         | 0.689     | -0.073 | 1.451  | 0.055    | -0.047 | 0.158 |
| BMI       | 6         | 0.885     | -0.009 | 1.778  | -0.031   | -0.159 | 0.097 |
| BMI       | 7         | 1.495     | 0.584  | 2.406  | 0.075    | -0.084 | 0.235 |
| BMI       | 8         | 1.309     | 0.410  | 2.208  | -0.084   | -0.281 | 0.113 |
| BMI       | 9         | 1.762     | 0.999  | 2.526  | 0.043    | -0.200 | 0.286 |
| BMI       | 10        | 2.933     | 2.092  | 3.773  | -0.026   | -0.378 | 0.327 |
| IQ        | 1         | 1.369     | -1.040 | 3.778  | 0.005    | -0.006 | 0.016 |
| IQ        | 2         | -0.260    | -2.860 | 2.341  | -0.011   | -0.042 | 0.019 |
| IQ        | 3         | 1.139     | -1.385 | 3.662  | 0.010    | -0.041 | 0.061 |
| IQ        | 4         | -0.725    | -3.287 | 1.838  | -0.009   | -0.081 | 0.063 |
| IQ        | 5         | 2.081     | -0.367 | 4.529  | 0.023    | -0.069 | 0.115 |
| IQ        | 6         | 1.483     | -0.982 | 3.949  | 0.019    | -0.099 | 0.137 |
| IQ        | 7         | 1.288     | -1.222 | 3.799  | -0.051   | -0.193 | 0.092 |
| IQ        | 8         | 2.379     | -0.215 | 4.973  | 0.092    | -0.083 | 0.268 |
| IQ        | 9         | 4.304     | 1.881  | 6.728  | -0.101   | -0.324 | 0.121 |
| IQ        | 10        | 3.291     | 0.934  | 5.647  | 0.023    | -0.293 | 0.340 |
| GCSE      | 1         | 0.068     | -0.067 | 0.203  | 0.005    | -0.004 | 0.013 |
| GCSE      | 2         | -0.057    | -0.204 | 0.090  | 0.001    | -0.023 | 0.024 |
| GCSE      | 3         | 0.195     | 0.053  | 0.336  | -0.012   | -0.051 | 0.026 |
| GCSE      | 4         | 0.080     | -0.063 | 0.223  | 0.021    | -0.033 | 0.074 |
| GCSE      | 5         | 0.097     | -0.039 | 0.234  | -0.022   | -0.094 | 0.049 |
| GCSE      | 6         | 0.266     | 0.129  | 0.403  | 0.054    | -0.039 | 0.146 |

|      |    |       |       |       |        |        |       |
|------|----|-------|-------|-------|--------|--------|-------|
| GCSE | 7  | 0.226 | 0.083 | 0.369 | 0.084  | -0.030 | 0.199 |
| GCSE | 8  | 0.307 | 0.180 | 0.435 | 0.060  | -0.079 | 0.200 |
| GCSE | 9  | 0.341 | 0.192 | 0.490 | 0.013  | -0.159 | 0.185 |
| GCSE | 10 | 0.471 | 0.327 | 0.614 | -0.202 | -0.445 | 0.041 |

---

**Note.** BMI = Body Mass Index; IQ = Intelligence; GCSE = General Certificate of Secondary Education (educational achievement); GPS = genome wide polygenic score; quant = quantile; phen = phenotype; CI.L = 95% lower confidence interval; CI.U = 95% upper confidence interval; GPS quant 1 = lowest absolute GPS twin pair difference quantile; GPS quant 10 = highest absolute GPS twin pair difference quantile.

## Supplementary Methods

### Methods S1. Polygenic score calculation

To calculate polygenic scores, we used a Bayesian approach to polygenic score calculation, implemented in the software *LDpred*<sup>1</sup>. In comparison with conventional clumping and p value thresholding approaches, LDpred has demonstrated an improvement in predictive accuracy<sup>1</sup>. Through this method, a posterior effect size is calculated for each single SNP that is present in both the GWA study summary statistics and the target genotype sample (see Table S2 for number of overlapping SNPs). To calculate the posterior effect size, the original summary statistic effect size estimates are adjusted based on two factors: (a) the relative influence of a SNP given its level of LD with surrounding SNPs in the target sample (here TEDS), and (b) a prior on the effect size of each SNP. To account for LD, we set the radius to a 2 megabase window. The effect size prior depends on the SNP-heritability of the discovery (i.e., GWA study) trait and an assumption on the fraction of causal markers believed to influence the discovery trait. Using the prior, the beta effect sizes are reweighted such that the effects are spread out among the SNPs across the whole genome in proportion to the LD present among these SNPs. To accommodate the high computational demands of these calculations, we reduced our genotype data set to SNPs that had perfect imputation scores (info = 1), leaving 515,100 SNPs for analysis. In the next step, all trait-associated alleles were counted (0, 1, or 2 for each SNP), weighted by the posterior SNP effect size obtained through LDpred, and summed across the genome to calculate a GPS for each individual in TEDS.

## References

1. Vilhjalmsson, B.J., Yang, J., Finucane, H.K., Gusev, A., Lindstrom, S., Ripke, S., Genovese, G., Loh, P.-R., Bhatia, G., Do, R., et al. (2015). Modeling Linkage Disequilibrium Increases Accuracy of Polygenic Risk Scores. *Am. J. Hum. Genet.* 97, 576–592.
2. Yengo, L., Sidorenko, J., Kemper, K.E., Zheng, Z., Wood, A.R., Weedon, M.N., Frayling, T.M., Hirschhorn, J., Yang, J., Visscher, P.M., et al. (2018). Meta-analysis of genome-wide association studies for height and body mass index in similar to 700 000 individuals of European ancestry. *Hum. Mol. Genet.* 27, 3641–3649.
3. McInnes, G., Tanigawa, Y., DeBoever, C., Lavertu, A., Olivieri, J.E., Aguirre, M., and Rivas, M.A. (2018). Global Biobank Engine: enabling genotype-phenotype browsing for biobank summary statistics. *Bioinformatics* 9, 1612.
4. Harris, S.E., Hagenaars, S.P., Davies, G., Hill, W.D., Liewald, D.C.M., Ritchie, S.J., Marioni, R.E., Sudlow, C.L.M., Wardlaw, J.M., McIntosh, A.M., et al. (2017). Molecular genetic contributions to self-rated health. *Int J Epidemiol* 46, 994–1009.
5. Savage, J.E., Jansen, P.R., Stringer, S., Watanabe, K., Bryois, J., de Leeuw, C.A., Nagel, M., Awasthi, S., Barr, P.B., Coleman, J.R.I., et al. (2018). Genome-wide association meta-analysis in 269,867 individuals identifies new genetic and functional links to intelligence. *Nat. Genet.* 50, 912–919.
6. Allegrini, A., Selzam, S., Rimfeld, K., Stumm, von, S., Pingault, J.-B., and Plomin, R. (2019). Genomic prediction of cognitive traits in childhood and adolescence. *Molecular Psychiatry*.
7. Lee, J.J., Wedow, R., Okbay, A., Kong, E., Maghziyan, O., Zacher, M., Nguyen-Viet, T.A., Bowers, P., Sidorenko, J., Linner, R.K., et al. (2018). Gene discovery and polygenic prediction from a genome-wide association study of educational attainment in 1.1 million individuals. *Nat. Genet.* 50, 1112–1121.
8. Luciano, M., Hagenaars, S.P., Davies, G., Hill, W.D., Clarke, T.-K., Shireh, M., Harris, S.E., Marioni, R.E., Liewald, D.C., Fawns-Ritchie, C., et al. (2018). Association analysis in over

329,000 individuals identifies 116 independent variants influencing neuroticism. *Nat. Genet.* 50, 6–11.

9. Demontis, D., Walters, R.K., Martin, J., Mattheisen, M., Als, T.D., Agerbo, E., Baldursson, G., Belliveau, R., Bybjerg-Grauholm, J., Bækvad-Hansen, M., et al. (2019). Discovery of the first genome-wide significant risk loci for attention deficit/hyperactivity disorder. *Nat. Genet.* 51, 63–75.

10. Pardiñas, A.F., Holmans, P., Pocklington, A.J., Escott-Price, V., Ripke, S., Carrera, N., Legge, S.E., Bishop, S., Cameron, D., Hamshere, M.L., et al. (2018). Common schizophrenia alleles are enriched in mutation-intolerant genes and in regions under strong background selection. *Nat. Genet.* 50, 381–389.
